# Supplementary material
Source: PubMed Central journal article supplement (PMC8156187)
Supplement: jamapsychiatry-e210959-s001.pdf [file jamapsychiatry-e210959-s001.pdf]

## Supplemental Online Content

Daghlas I, Lane JM, Saxena R, Vetter C. Genetically proxied diurnal preference, sleep timing, and risk of major depressive disorder. *JAMA Psychiatry*. Published online May 26, 2021. doi:10.1001/jamapsychiatry.2021.0959

### **eMethods.**

### **eReferences.**

**eFigure 1.** Workflow of Mendelian randomization analyses

**eFigure 2.** Graphical portrayal of Mendelian randomization scaling method

**eFigure 3.** Graphical assessment of bias in the primary Mendelian randomization analysis.

**eTable 1.** Genetic associations of all 340 genetic variants with morning diurnal preference in the 23andMe sample.

**eTable 2.** Lead variants associated with diurnal preference that were not available in the PGC-UKB MDD GWAS ('Original SNP') and identified proxy SNP.

**eTable 3.** Associations of available diurnal preference genetic variants with major depressive disorder in the PGC-UKB meta-analysis.

**eTable 4.** Associations of morning diurnal preference genetic variants with midpoint of sleep.

**eTable 5.** Variants identified as outliers by MR-PRESSO and RadialMR.

**eTable 6.** Random-effects inverse-variance weighted MR estimates for the effect of genetically proxied morning diurnal preference on depression (PGC-UKB) after progressive filtering of variants associated with other sleep phenotypes (sleep duration, short sleep duration, long sleep duration, daytime sleepiness, insomnia symptoms).

**eTable 7.** Leave-one-out MR estimates for the effect of genetically proxied morning diurnal preference on major depressive disorder (using the PGC-UKB dataset).

This supplemental material has been provided by the authors to give readers additional information about their work.

## **eMethods.**

### *Phenotype definition*

In the UKB, diurnal preference was defined by the answer to the question “Do you consider yourself to be?” with one of six possible answers: “Definitely a ‘morning’ person”, “More a ‘morning’ than ‘evening’ person”, “More an ‘evening’ than a ‘morning’ person”, “Definitely an ‘evening’ person”, “Do not know” or “Prefer not to answer”<sup>1</sup>. This question is similar to the last question of the Morningness-Eveningness Questionnaire, a widely used tool to assess diurnal preference<sup>2</sup>. Those reporting definitely being a morning person or ‘more a morning than evening person’ were classified as reporting morning diurnal preference, and vice versa for evening preference.

Diurnal preference in the 23andMe cohort was assessed through the question “Are you naturally a night person or a morning person?” This question was presented twice, with answers in one instance including “Night owl”, “Early bird” and “Neither”, and answers for the second instance including “Night person”, “Morning person”, “Neither”, “It depends” and “I’m not sure”. 23andMe participants with inconsistent or neutral responses across both questions were excluded, and individuals with one neutral and one non-neutral response were coded based on their non-neutral response. The referent group comprised participants reporting evening preference ( $n=127,622$ ), while those reporting morning preference were coded as the exposure group ( $n=120,478$ ).

### *Data harmonization and identification of proxies*

For each of the diurnal preference-associated variants we extracted genetic associations with MDD from the PGC-UKB meta-analysis. When genetic variants were not available in the MDD GWAS, we used biallelic proxies in high linkage disequilibrium as measured in the European sample of the 1000 Genomes Project ( $r^2 > 0.90$ , 7 proxies listed in eTable 2). These datasets were aligned to the same effect allele, assuming orientation to the forward strand in all datasets.

### *Sensitivity analyses*

We performed a series of sensitivity analyses to assess the impact of bias attributable to horizontal pleiotropy, residual linkage-disequilibrium between variants, and variant weighting.

### *Horizontal pleiotropy*

To assess sensitivity of results to horizontal pleiotropy, we first considered a set of model-based analyses that each relax distinct assumptions regarding pleiotropy. We used the following models: robust, penalized IVW<sup>3</sup>, weighted median<sup>4</sup>, Bayesian-weighted MR<sup>5</sup>, MR-RAPS<sup>6</sup>, and MR-Egger<sup>7</sup>. The intercept from the Egger model can be used for a statistical test for pleiotropy in the analysis. Second, we conducted analyses investigating the influence of pleiotropic outlier variants using the MR-PRESSO<sup>8</sup> and RadialMR<sup>9</sup> methods<sup>10</sup>. Third, we removed variants from the diurnal preference genetic instrument that were associated with one of the following self-reported sleep phenotypes in UKB at varying  $P$  value thresholds ( $5 \times 10^{-8}$ ,  $5 \times 10^{-5}$ , and  $5 \times 10^{-3}$ ): sleep duration<sup>11</sup> ( $n=446,118$ ), short sleep duration (106,192 cases / 305,742 controls), long sleep duration (34,184 cases / 305,742 controls), insomnia symptoms<sup>12</sup> (129,270 cases / 108,352 controls), napping ( $n=452,633$ ), and daytime sleepiness<sup>13</sup>

( $n=452,071$ ). To examine sensitivity to single outlying variants, we performed a leave-one-out analysis, systematically removing a single variant in the genetic instrument and re-estimating IVW effects<sup>10</sup>. Finally, we created scatter and funnel plots to visually inspect the data for strong influence by single variants, or for systemic bias across multiple variants<sup>10</sup>.

### *Residual linkage-disequilibrium*

To determine whether residual correlations between variants influenced our results, we used a stricter clumping threshold (10Mb clumping window,  $r^2=0.001$ ) to further prune the set of diurnal preference variants previously reported as independent<sup>1</sup>. This pruned set of variants was only considered as a sensitivity analysis because variants were already selected to be independent in the initial GWAS<sup>1</sup>.

### *Variant weighting*

Although all included diurnal preference variants were genome-wide significant in meta-analysis, we performed an analysis using only variants attaining genome-wide significance in 23andMe to strengthen the case for independence of the exposure and outcome datasets, and to assess for potential bias due to weak instruments.

The 23andMe GWAS did not use linear mixed models to derive their genetic associations and the genetic association estimates may therefore be biased by residual population stratification<sup>1</sup>. We therefore performed analyses using instrument weights from

the entire UK Biobank sample (with associations estimated using the BOLT linear mixed model software<sup>14</sup>). We tested this genetic instrument against the PGC outcome dataset to minimize exposure-outcome sample overlap.

To minimize the potential for associations of the genetic variants with diurnal preference to be confounded by comorbid working patterns or psychiatric disease, we used genetic associations from the UKB excluding participants reporting any of the following: shift or night shift work, taking medication for sleep or psychiatric disorders, an ICD-10 or self-reported diagnosis of MDD, schizophrenia, bipolar disorder, anxiety disorders or mood disorder<sup>1</sup>. This approach is analogous to prior MR investigations that aimed to minimize confounding of variant associations by comorbidities<sup>15</sup>. As above, we tested this genetic instrument against the PGC outcome dataset to minimize exposure-outcome sample overlap.

#### *Assessing for a reverse causal effect of liability to MDD on diurnal preference*

We assessed for bias due to reverse causality by testing the effect of MDD genetic liability (using the PGC-UKB) on morning diurnal preference in UK Biobank (binary trait;  $n=449,734^1$ ). We identified genetic proxies for liability to MDD as genome-wide significant genetic variants ( $P<5\times 10^{-8}$ ) that were present in the diurnal preference dataset, and which were independent (pair-wise  $r^2<0.001$ ). This approach identified 50 independent variants for use as genetic proxies for MDD liability in MR analyses.

## eReferences.

1. Jones SE, Lane JM, Wood AR, van Hees VT, Tyrrell J, Beaumont RN, Jeffries AR, Dashti HS, Hillsdon M, Ruth KS, Tuke MA, Yaghootkar H, Sharp SA, Jie Y, Thompson WD, Harrison JW, Dawes A, Byrne EM, Tiemeier H, Allebrandt K V., Bowden J, Ray DW, Freathy RM, Murray A, Mazzotti DR, Gehrman PR, Lawlor DA, Frayling TM, Rutter MK, Hinds DA, Saxena R, Weedon MN. Genome-wide association analyses of chronotype in 697,828 individuals provides insights into circadian rhythms. *Nat Commun.* 2019;10:343.
2. Horne JA, Ostberg O. A self-assessment questionnaire to determine morningness-eveningness in human circadian rhythms. *Int J Chronobiol.* 1976;4:97–110.
3. Rees JMB, Wood AM, Dudbridge F, Burgess S. Robust methods in Mendelian randomization via penalization of heterogeneous causal estimates. *PLoS One.* 2019;14:e0222362.
4. Bowden J, Davey Smith G, Haycock PC, Burgess S. Consistent Estimation in Mendelian Randomization with Some Invalid Instruments Using a Weighted Median Estimator. *Genet Epidemiol.* 2016;40:304–314.
5. Zhao J, Ming J, Hu X, Chen G, Liu J, Yang C. Bayesian weighted Mendelian randomization for causal inference based on summary statistics. *Bioinformatics.* 2019;00:1–9.
6. Zhao Q, Wang J, Hemani G, Bowden J, Small DS. Statistical inference in two-sample summary-data Mendelian randomization using robust adjusted profile score. 2018.
7. Bowden J, Smith GD, Burgess S. Mendelian randomization with invalid instruments: Effect estimation and bias detection through Egger regression. *Int J Epidemiol.* 2015;44:512–525.
8. Verbanck M, Chen C-Y, Neale B, Do R. Detection of widespread horizontal pleiotropy in causal relationships inferred from Mendelian randomization between complex traits and diseases. *Nat Genet.* 2018;50:693–698.
9. Bowden J, Spiller W, Del Greco FM, Sheehan N, Thompson J, Minelli C, Smith GD. Improving the visualization, interpretation and analysis of two-sample summary data Mendelian randomization via the Radial plot and Radial regression. *Int J Epidemiol.* 2018;47:1264–1278.
10. Hemani G, Zheng J, Elsworth B, Wade KH, Haberland V, Baird D, Laurin C, Burgess S, Bowden J, Langdon R, Tan VY, Yarmolinsky J, Shihab HA, Timpson NJ, Evans DM, Relton C, Martin RM, Davey Smith G, Gaunt TR, Haycock PC. The MR-Base platform supports systematic causal inference across the human phenome. *Elife.* 2018;7:e34408.
11. Dashti HS, Jones SE, Wood AR, Lane JM, van Hees VT, Wang H, Rhodes JA, Song Y, Patel K, Anderson SG, Beaumont RN, Bechtold DA, Bowden J, Cade BE, Garaulet M, Kyle SD, Little MA, Loudon AS, Luik AI, Scheer FAJL, Spiegelhalter K, Tyrrell J, Gottlieb DJ, Tiemeier H, Ray DW, Purcell SM, Frayling TM, Redline S, Lawlor DA, Rutter MK, Weedon MN, Saxena R. Genome-wide association study identifies genetic loci for self-reported habitual sleep duration supported by accelerometer-derived estimates. *Nat Commun.* 2019;10:1100.
12. Lane JM, Jones SE, Dashti HS, Wood AR, Aragam KG, van Hees VT, Strand LB, Winsvold BS, Wang H, Bowden J, Song Y, Patel K, Anderson SG, Beaumont RN, Bechtold DA, Cade BE, Haas M, Kathiresan S, Little MA, Luik AI, Loudon AS, Purcell S, Richmond RC, Scheer FAJL, Schormair B, Tyrrell J, Winkelmann JW, Winkelmann J, Hveem K, Zhao C, Nielsen

- JB, Willer CJ, Redline S, Spiegelhalder K, Kyle SD, Ray DW, Zwart J-A, Brumpton B, Frayling TM, Lawlor DA, Rutter MK, Weedon MN, Saxena R. Biological and clinical insights from genetics of insomnia symptoms. *Nat Genet.* 2019;51:387–393.
13. Wang H, Lane JM, Jones SE, Dashti HS, Ollila HM, Wood AR, van Hees VT, Brumpton B, Winsvold BS, Kantojärvi K, Palviainen T, Cade BE, Sofer T, Song Y, Patel K, Anderson SG, Bechtold DA, Bowden J, Emsley R, Kyle SD, Little MA, Loudon AS, Scheer FAJL, Purcell SM, Richmond RC, Spiegelhalder K, Tyrrell J, Zhu X, Hublin C, Kaprio JA, Kristiansson K, Sulkava S, Paunio T, Hveem K, Nielsen JB, Willer CJ, Zwart J-A, Strand LB, Frayling TM, Ray D, Lawlor DA, Rutter MK, Weedon MN, Redline S, Saxena R. Genome-wide association analysis of self-reported daytime sleepiness identifies 42 loci that suggest biological subtypes. *Nat Commun.* 2019;10:3503.
  14. Loh PR, Tucker G, Bulik-Sullivan BK, Vilhjálmsson BJ, Finucane HK, Salem RM, Chasman DI, Ridker PM, Neale BM, Berger B, Patterson N, Price AL. Efficient Bayesian mixed-model analysis increases association power in large cohorts. *Nat Genet.* 2015;47:284–290.
  15. Daghlas I, Dashti HS, Lane J, Aragam KG, Rutter MK, Saxena R, Vetter C. Sleep Duration and Myocardial Infarction. *J Am Coll Cardiol.* 2019;74:1304–1314.

**eFigure 1. Workflow of Mendelian randomization analyses.** The Psychiatric Genomics Consortium (PGC) dataset included 45,369 cases and 97,250 controls), while the UK Biobank (UKB) dataset included 113,769 cases and 208,811 controls.

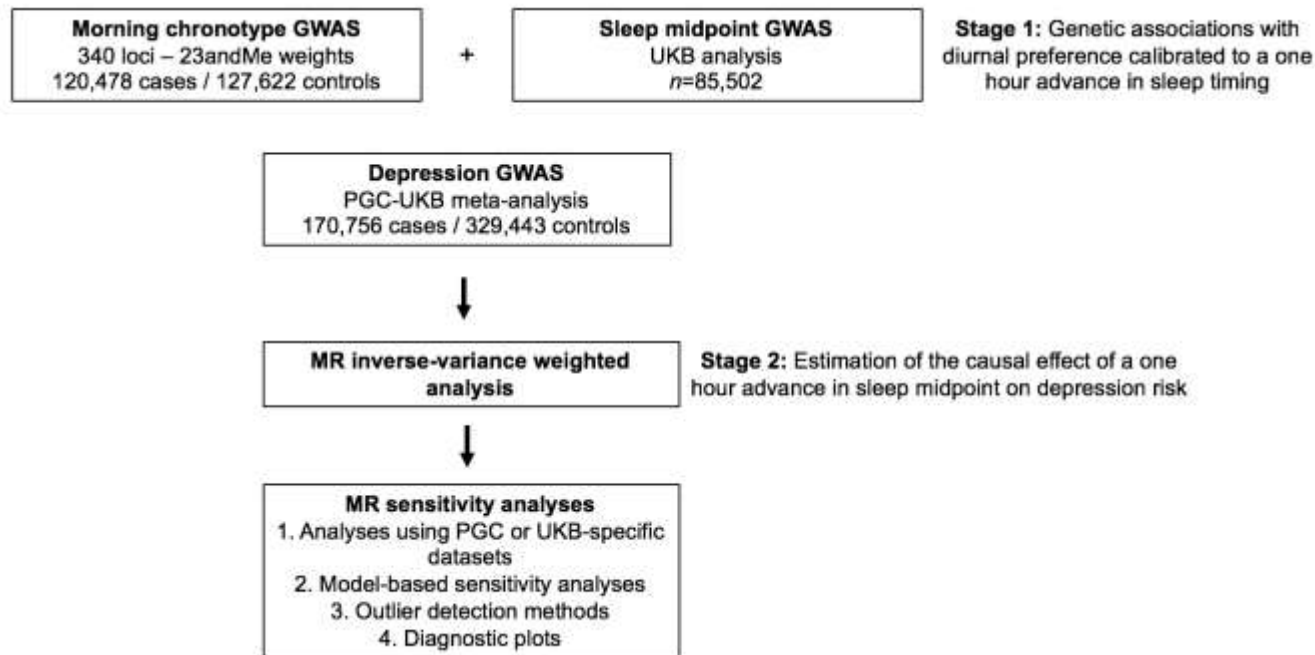



**eFigure 2. Graphical portrayal of Mendelian randomization scaling method.**

| <b>Stage 1</b>                                                                                                              |          | <b>Stage 2</b>                                                                                         |          | <b>Final result</b>                                                                                                                       |
|-----------------------------------------------------------------------------------------------------------------------------|----------|--------------------------------------------------------------------------------------------------------|----------|-------------------------------------------------------------------------------------------------------------------------------------------|
| Log odds of morning diurnal preference<br><hr style="width: 20%; margin: 0 auto;"/><br>0.125-hour advance of sleep midpoint | <b>X</b> | Log odds of MDD<br><hr style="width: 20%; margin: 0 auto;"/><br>Log odds of morning diurnal preference | <b>=</b> | Log odds of MDD<br><hr style="width: 20%; margin: 0 auto;"/><br>Morning diurnal preference scaled to<br>an hour advance in sleep midpoint |

**eFigure 3. Graphical assessment of bias in the primary Mendelian randomization analysis.** **(A)** Scatter plot of SNP effects on morning diurnal preference (scaled to hour earlier sleep midpoint) plotted against SNP effect on log-odds of depression in PGC-UKB. Each point represents one of the variants proxying diurnal preference, with the bars representing standard errors of SNP effect estimates on the diurnal preference exposure and the MDD outcome. The diagonal line represents the inverse-variance weighted regression line, and the slope of this line represents the causal effect of diurnal preference on MDD, scaled to an hour earlier sleep midpoint. **(B)** Funnel plot of causal effect estimates (x-axis) plotted against 1/square root (standard error of causal effect estimates) using all SNPs proxying diurnal preference. In the absence of unbalanced horizontal pleiotropy, the points should fall symmetrically on either side of the origin. **(C)** Funnel plot of causal effect estimates plotted against 1/square root of the standard error of causal effect estimates using SNPs remaining after RadialMR pruning of potentially pleiotropic outlier SNPs. In the absence of unbalanced horizontal pleiotropy, the points should fall symmetrically on either side of the origin.

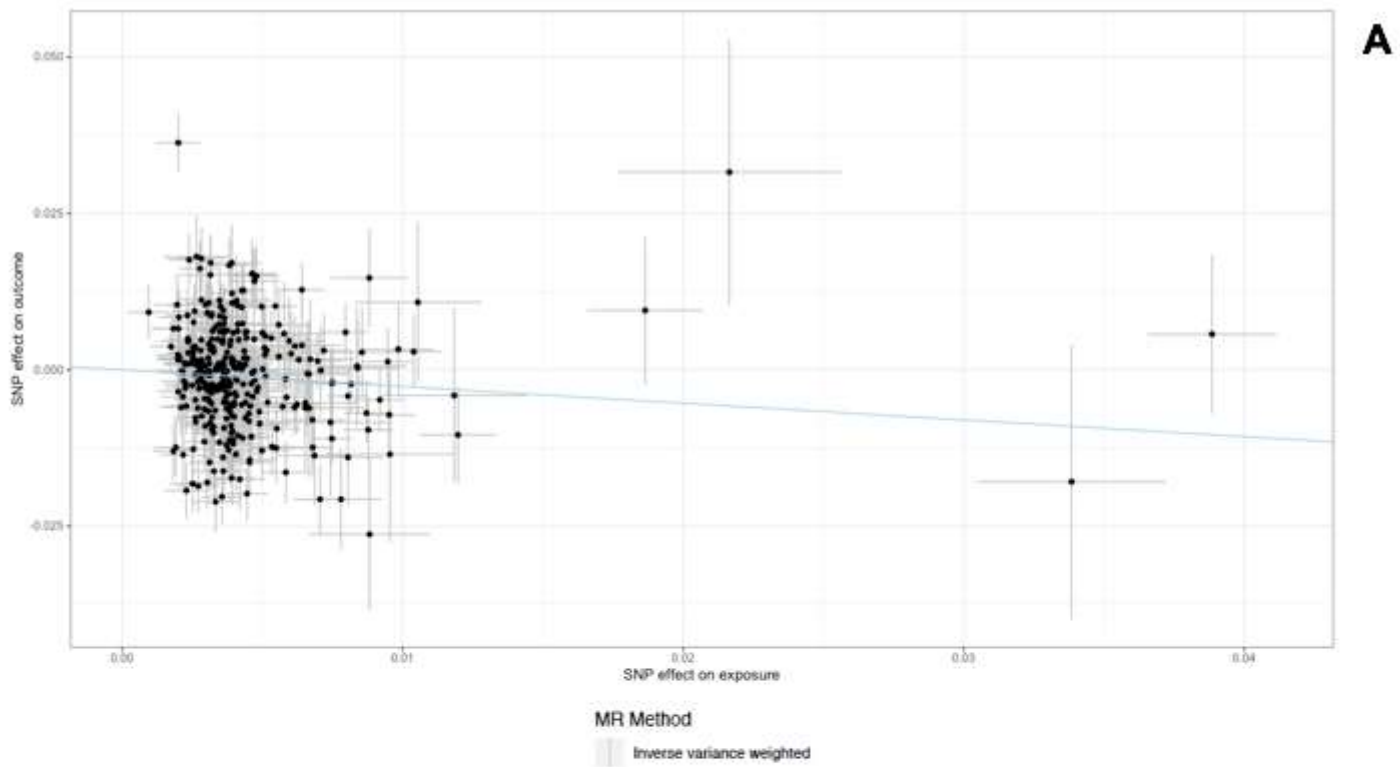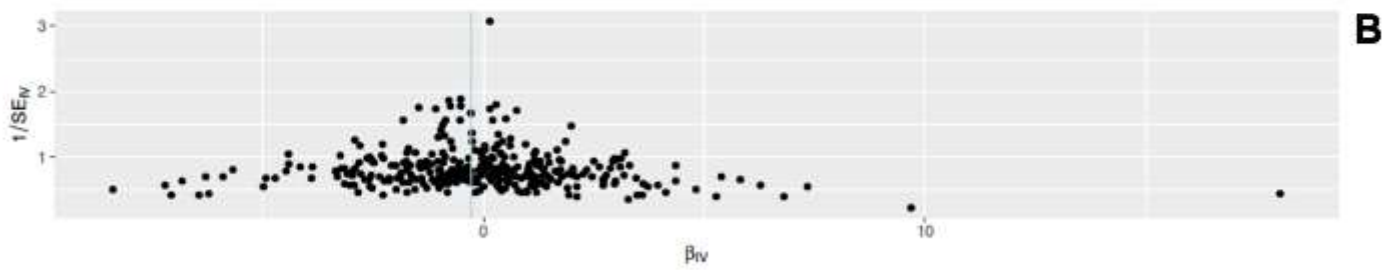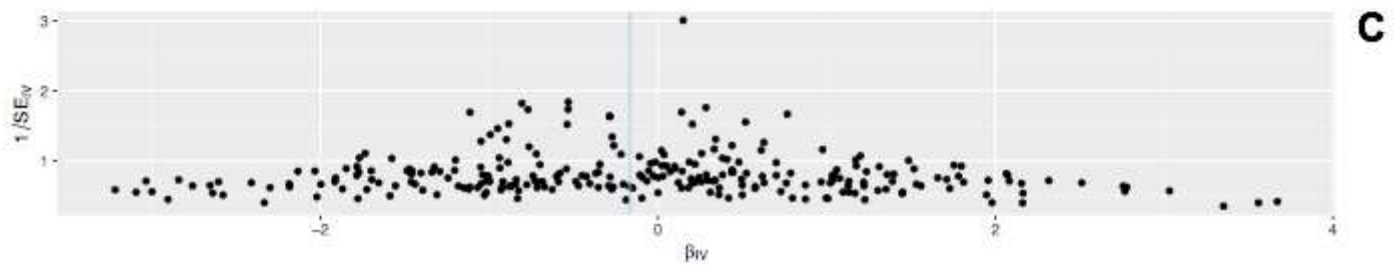

**eTable 1. Genetic associations of all 340 genetic variants with morning diurnal preference in the 23andMe sample. EA: effect allele; OA: other allele.**

| SNP         | EA | OA | EA frequency | Beta   | Standard error | P value  |
|-------------|----|----|--------------|--------|----------------|----------|
| rs909757    | T  | C  | 0.630        | 0.020  | 0.006          | 1.05E-03 |
| rs61773390  | T  | G  | 0.193        | 0.077  | 0.008          | 6.29E-24 |
| rs12065331  | T  | C  | 0.313        | -0.030 | 0.007          | 5.35E-06 |
| rs17448682  | T  | C  | 0.234        | 0.035  | 0.007          | 8.35E-07 |
| rs10917513  | T  | C  | 0.648        | -0.035 | 0.006          | 2.88E-08 |
| rs10916892  | T  | C  | 0.620        | -0.037 | 0.006          | 2.40E-09 |
| rs2506089   | T  | G  | 0.568        | 0.028  | 0.006          | 1.21E-05 |
| rs12140153  | T  | G  | 0.089        | -0.068 | 0.012          | 1.44E-08 |
| rs11208844  | A  | G  | 0.141        | -0.032 | 0.008          | 1.84E-04 |
| rs12040629  | A  | G  | 0.160        | 0.084  | 0.008          | 7.07E-25 |
| rs11588913  | A  | G  | 0.404        | -0.021 | 0.006          | 5.68E-04 |
| rs5016898   | T  | C  | 0.424        | -0.029 | 0.006          | 1.31E-06 |
| rs72720396  | A  | G  | 0.774        | -0.037 | 0.007          | 4.94E-07 |
| rs481214    | A  | T  | 0.606        | 0.020  | 0.006          | 1.22E-03 |
| rs11165655  | A  | G  | 0.528        | -0.029 | 0.006          | 1.63E-06 |
| rs17575798  | A  | G  | 0.192        | -0.034 | 0.008          | 9.47E-06 |
| rs6690292   | T  | C  | 0.729        | -0.025 | 0.007          | 1.64E-04 |
| rs11102807  | A  | G  | 0.536        | -0.019 | 0.006          | 1.64E-03 |
| rs9436119   | A  | G  | 0.384        | 0.053  | 0.006          | 9.87E-17 |
| rs6665637   | A  | G  | 0.280        | -0.027 | 0.007          | 1.09E-04 |
| rs115073088 | A  | G  | 0.975        | -0.077 | 0.018          | 2.71E-05 |
| rs975025    | T  | C  | 0.076        | -0.052 | 0.011          | 6.50E-06 |
| rs1144566   | T  | C  | 0.029        | 0.312  | 0.018          | 3.20E-65 |
| rs1221502   | A  | C  | 0.739        | 0.023  | 0.007          | 8.22E-04 |
| rs4657983   | A  | G  | 0.651        | -0.031 | 0.006          | 7.38E-07 |
| rs6429233   | A  | G  | 0.457        | 0.022  | 0.006          | 2.82E-04 |

|             |   |   |       |        |       |          |
|-------------|---|---|-------|--------|-------|----------|
| rs13011556  | C | G | 0.762 | -0.025 | 0.007 | 5.27E-04 |
| rs62124718  | A | G | 0.895 | -0.057 | 0.010 | 1.01E-08 |
| rs72796401  | A | T | 0.190 | 0.029  | 0.008 | 1.35E-04 |
| rs6718511   | A | G | 0.557 | 0.026  | 0.006 | 2.27E-05 |
| rs11678584  | A | T | 0.860 | -0.041 | 0.009 | 2.70E-06 |
| rs848552    | C | G | 0.476 | -0.033 | 0.006 | 5.11E-08 |
| rs7602499   | T | C | 0.354 | 0.026  | 0.006 | 4.34E-05 |
| rs75120545  | T | C | 0.032 | 0.085  | 0.018 | 2.93E-06 |
| rs6544906   | A | C | 0.562 | 0.030  | 0.006 | 6.65E-07 |
| rs17396357  | T | C | 0.382 | 0.032  | 0.006 | 1.88E-07 |
| rs12470914  | A | T | 0.101 | 0.069  | 0.010 | 1.01E-11 |
| rs4672458   | T | C | 0.476 | -0.018 | 0.006 | 2.48E-03 |
| rs13414393  | T | C | 0.541 | -0.021 | 0.006 | 3.50E-04 |
| rs10175975  | T | C | 0.185 | 0.016  | 0.008 | 3.37E-02 |
| rs359248    | T | G | 0.456 | -0.038 | 0.006 | 3.13E-10 |
| rs812925    | C | G | 0.646 | -0.031 | 0.006 | 5.38E-07 |
| rs113851554 | T | G | 0.057 | -0.067 | 0.014 | 2.18E-06 |
| rs2706762   | T | C | 0.150 | -0.045 | 0.008 | 7.00E-08 |
| rs12464387  | A | G | 0.464 | -0.024 | 0.006 | 8.17E-05 |
| rs6727752   | A | G | 0.357 | 0.023  | 0.007 | 4.50E-04 |
| rs10520176  | T | C | 0.493 | 0.039  | 0.006 | 3.06E-10 |
| rs11681299  | T | C | 0.284 | 0.035  | 0.007 | 1.02E-07 |
| rs34509802  | A | G | 0.179 | 0.051  | 0.008 | 2.37E-10 |
| rs76064513  | T | C | 0.134 | 0.042  | 0.009 | 3.70E-06 |
| rs77248969  | A | G | 0.112 | -0.034 | 0.009 | 1.16E-04 |
| rs28380327  | A | T | 0.632 | 0.052  | 0.006 | 8.21E-17 |
| rs2166559   | T | C | 0.861 | -0.025 | 0.009 | 4.01E-03 |
| rs747003    | T | C | 0.609 | 0.017  | 0.006 | 4.53E-03 |
| rs13004345  | T | C | 0.648 | -0.026 | 0.006 | 3.87E-05 |
| rs6433478   | T | C | 0.460 | -0.035 | 0.006 | 6.85E-09 |

|             |   |   |       |        |       |          |
|-------------|---|---|-------|--------|-------|----------|
| rs4666682   | A | G | 0.180 | -0.029 | 0.008 | 1.56E-04 |
| rs11677484  | T | G | 0.257 | 0.018  | 0.007 | 9.81E-03 |
| rs1064213   | A | G | 0.483 | 0.065  | 0.006 | 1.99E-27 |
| rs184033703 | A | G | 0.059 | 0.054  | 0.013 | 1.98E-05 |
| rs80271258  | T | C | 0.084 | -0.096 | 0.011 | 1.48E-18 |
| rs62182135  | A | C | 0.329 | -0.026 | 0.006 | 4.77E-05 |
| rs35346733  | A | G | 0.194 | -0.032 | 0.008 | 2.99E-05 |
| rs111261826 | A | C | 0.679 | -0.031 | 0.006 | 1.31E-06 |
| rs149611468 | T | C | 0.989 | 0.174  | 0.032 | 5.00E-08 |
| rs6794796   | A | G | 0.290 | 0.021  | 0.007 | 1.34E-03 |
| rs9817910   | A | G | 0.558 | -0.016 | 0.006 | 6.16E-03 |
| rs73050286  | T | C | 0.782 | 0.030  | 0.007 | 3.36E-05 |
| rs2362775   | T | C | 0.534 | -0.008 | 0.006 | 2.07E-01 |
| rs114848860 | A | T | 0.974 | -0.095 | 0.021 | 4.29E-06 |
| rs78580841  | T | C | 0.069 | 0.046  | 0.012 | 2.10E-04 |
| rs12636669  | T | C | 0.080 | 0.071  | 0.011 | 1.69E-10 |
| rs17007397  | C | G | 0.580 | 0.026  | 0.006 | 2.10E-05 |
| rs7626335   | A | C | 0.331 | -0.041 | 0.006 | 9.21E-11 |
| rs7429614   | T | G | 0.416 | 0.046  | 0.006 | 4.00E-14 |
| rs12631477  | T | C | 0.798 | 0.028  | 0.007 | 1.69E-04 |
| rs1449403   | A | G | 0.123 | 0.055  | 0.009 | 3.13E-09 |
| rs34967119  | A | G | 0.496 | 0.023  | 0.006 | 1.28E-04 |
| rs1398346   | T | C | 0.867 | 0.033  | 0.009 | 1.46E-04 |
| rs1800828   | C | G | 0.751 | 0.016  | 0.007 | 2.33E-02 |
| rs72950188  | T | C | 0.924 | 0.054  | 0.011 | 1.36E-06 |
| rs72966564  | T | C | 0.251 | -0.020 | 0.007 | 7.79E-03 |
| rs13065394  | T | G | 0.286 | -0.024 | 0.007 | 3.02E-04 |
| rs4550782   | T | G | 0.666 | 0.029  | 0.006 | 4.16E-06 |
| rs7649164   | T | G | 0.575 | 0.024  | 0.006 | 1.20E-04 |
| rs6440833   | A | G | 0.464 | 0.029  | 0.006 | 1.41E-06 |

|            |   |   |       |        |       |          |
|------------|---|---|-------|--------|-------|----------|
| rs35588117 | A | G | 0.102 | -0.033 | 0.010 | 1.29E-03 |
| rs1599374  | A | G | 0.516 | 0.037  | 0.006 | 4.34E-10 |
| rs3850174  | A | T | 0.258 | -0.039 | 0.007 | 2.53E-08 |
| rs301218   | A | G | 0.392 | -0.032 | 0.006 | 1.02E-07 |
| rs9836621  | T | C | 0.522 | -0.040 | 0.006 | 1.21E-11 |
| rs1468945  | A | G | 0.785 | -0.036 | 0.007 | 9.81E-07 |
| rs3796618  | A | T | 0.529 | -0.020 | 0.006 | 8.43E-04 |
| rs4690085  | A | G | 0.535 | -0.015 | 0.006 | 1.38E-02 |
| rs4698678  | C | G | 0.279 | 0.038  | 0.007 | 2.26E-08 |
| rs1502249  | A | G | 0.522 | 0.022  | 0.006 | 3.02E-04 |
| rs6838677  | A | C | 0.669 | -0.022 | 0.006 | 5.24E-04 |
| rs4860734  | A | G | 0.290 | 0.024  | 0.007 | 2.00E-04 |
| rs6816922  | A | C | 0.538 | -0.022 | 0.006 | 1.86E-04 |
| rs6846730  | T | C | 0.235 | -0.029 | 0.007 | 3.82E-05 |
| rs2850979  | T | C | 0.760 | -0.022 | 0.007 | 1.48E-03 |
| rs7700110  | A | G | 0.257 | 0.031  | 0.007 | 8.01E-06 |
| rs17455138 | T | C | 0.766 | 0.041  | 0.007 | 7.25E-09 |
| rs4241964  | T | G | 0.522 | -0.023 | 0.006 | 1.88E-04 |
| rs938836   | A | G | 0.467 | -0.027 | 0.006 | 1.09E-05 |
| rs72729847 | T | C | 0.801 | -0.036 | 0.007 | 1.27E-06 |
| rs9997394  | A | G | 0.287 | -0.031 | 0.007 | 2.30E-06 |
| rs10058356 | T | C | 0.696 | -0.018 | 0.007 | 6.20E-03 |
| rs7701529  | A | T | 0.239 | -0.029 | 0.007 | 2.82E-05 |
| rs7721608  | T | G | 0.465 | 0.030  | 0.006 | 5.00E-07 |
| rs66507804 | T | C | 0.799 | -0.038 | 0.008 | 5.51E-07 |
| rs4269995  | T | C | 0.251 | -0.047 | 0.007 | 1.09E-11 |
| rs77960    | A | G | 0.330 | 0.016  | 0.006 | 1.12E-02 |
| rs1559253  | A | G | 0.359 | 0.036  | 0.006 | 1.05E-08 |
| rs17140201 | A | G | 0.172 | -0.024 | 0.008 | 3.22E-03 |
| rs13172141 | A | T | 0.569 | 0.028  | 0.006 | 5.01E-06 |

|            |   |   |       |        |       |          |
|------------|---|---|-------|--------|-------|----------|
| rs67988891 | C | G | 0.682 | -0.031 | 0.006 | 1.27E-06 |
| rs2901796  | A | G | 0.398 | 0.026  | 0.006 | 2.68E-05 |
| rs42210    | C | G | 0.712 | -0.031 | 0.007 | 3.34E-06 |
| rs12518401 | A | G | 0.384 | -0.034 | 0.007 | 2.04E-07 |
| rs465670   | T | C | 0.540 | 0.023  | 0.006 | 1.38E-04 |
| rs9394154  | C | G | 0.436 | -0.019 | 0.006 | 1.72E-03 |
| rs9381812  | A | G | 0.705 | -0.070 | 0.007 | 9.63E-27 |
| rs1811899  | T | C | 0.790 | -0.037 | 0.007 | 2.89E-07 |
| rs9465253  | T | C | 0.280 | 0.026  | 0.007 | 8.48E-05 |
| rs766406   | T | G | 0.641 | -0.034 | 0.006 | 4.01E-08 |
| rs605203   | A | C | 0.653 | -0.020 | 0.007 | 1.79E-03 |
| rs13203140 | T | C | 0.635 | -0.029 | 0.006 | 2.79E-06 |
| rs3923809  | A | G | 0.695 | -0.029 | 0.006 | 6.07E-06 |
| rs12206814 | C | G | 0.487 | 0.017  | 0.007 | 1.08E-02 |
| rs2396004  | A | G | 0.435 | 0.025  | 0.006 | 2.29E-05 |
| rs3857599  | A | C | 0.166 | 0.019  | 0.008 | 1.88E-02 |
| rs2653349  | A | G | 0.207 | 0.074  | 0.008 | 9.08E-23 |
| rs9476310  | T | C | 0.510 | 0.032  | 0.006 | 8.61E-08 |
| rs1931814  | A | G | 0.479 | 0.031  | 0.006 | 1.84E-07 |
| rs2881955  | T | C | 0.279 | 0.028  | 0.007 | 3.14E-05 |
| rs12195792 | A | T | 0.272 | 0.047  | 0.007 | 1.49E-12 |
| rs11154718 | T | C | 0.430 | -0.027 | 0.006 | 5.63E-06 |
| rs60616179 | A | G | 0.944 | 0.031  | 0.013 | 1.78E-02 |
| rs4535583  | T | C | 0.699 | 0.027  | 0.007 | 3.49E-05 |
| rs9496643  | G | A | 0.733 | -0.023 | 0.007 | 6.04E-04 |
| rs2050185  | A | G | 0.625 | 0.018  | 0.006 | 2.74E-03 |
| rs9479402  | T | C | 0.988 | -0.272 | 0.027 | 6.75E-24 |
| rs9347926  | A | T | 0.441 | 0.032  | 0.006 | 1.64E-07 |
| rs9348050  | T | C | 0.486 | 0.019  | 0.006 | 1.49E-03 |
| rs4027217  | A | C | 0.217 | -0.024 | 0.007 | 8.71E-04 |



|             |   |   |       |        |       |          |
|-------------|---|---|-------|--------|-------|----------|
| rs10237162  | T | C | 0.723 | 0.050  | 0.007 | 8.94E-14 |
| rs10951325  | T | C | 0.632 | 0.037  | 0.006 | 2.47E-09 |
| rs6967481   | T | C | 0.501 | 0.036  | 0.006 | 2.52E-09 |
| rs4236237   | A | C | 0.599 | -0.031 | 0.006 | 4.42E-07 |
| rs2944831   | A | G | 0.295 | 0.025  | 0.007 | 2.02E-04 |
| rs3807651   | A | T | 0.494 | 0.022  | 0.006 | 2.99E-04 |
| rs10254050  | C | G | 0.191 | -0.076 | 0.008 | 3.64E-24 |
| rs4729854   | A | T | 0.470 | -0.056 | 0.007 | 6.26E-16 |
| rs6961970   | A | C | 0.239 | 0.038  | 0.007 | 1.48E-07 |
| rs17302081  | T | C | 0.441 | 0.014  | 0.006 | 1.97E-02 |
| rs6968240   | A | C | 0.417 | 0.033  | 0.006 | 9.69E-08 |
| rs62465218  | A | C | 0.146 | -0.039 | 0.009 | 4.97E-06 |
| rs6958557   | T | G | 0.607 | 0.035  | 0.006 | 9.06E-09 |
| rs113161209 | A | G | 0.077 | 0.039  | 0.011 | 4.42E-04 |
| rs2072413   | T | C | 0.262 | -0.024 | 0.007 | 8.48E-04 |
| rs62479736  | T | G | 0.292 | 0.026  | 0.007 | 1.14E-04 |
| rs35524253  | A | G | 0.354 | 0.047  | 0.006 | 8.57E-14 |
| rs2979139   | A | G | 0.505 | -0.030 | 0.006 | 5.57E-07 |
| rs2322605   | A | G | 0.468 | -0.025 | 0.006 | 3.35E-05 |
| rs71523448  | C | G | 0.079 | -0.063 | 0.012 | 6.25E-08 |
| rs6993892   | T | C | 0.616 | -0.037 | 0.006 | 1.45E-09 |
| rs6468316   | T | C | 0.471 | -0.015 | 0.006 | 1.45E-02 |
| rs7845620   | A | C | 0.834 | -0.058 | 0.008 | 5.72E-13 |
| rs10109566  | A | G | 0.485 | -0.022 | 0.006 | 2.74E-04 |
| rs34054660  | A | G | 0.575 | 0.033  | 0.006 | 3.93E-08 |
| rs187028    | A | T | 0.315 | -0.028 | 0.007 | 1.94E-05 |
| rs16939162  | A | G | 0.830 | 0.033  | 0.008 | 4.04E-05 |
| rs6988733   | T | C | 0.349 | 0.025  | 0.006 | 5.80E-05 |
| rs7006885   | A | G | 0.288 | 0.050  | 0.007 | 4.66E-14 |
| rs3100052   | A | G | 0.389 | 0.021  | 0.006 | 6.77E-04 |

|            |   |   |       |        |       |          |
|------------|---|---|-------|--------|-------|----------|
| rs2737245  | T | G | 0.275 | 0.035  | 0.007 | 3.01E-07 |
| rs1871729  | A | G | 0.682 | -0.026 | 0.006 | 4.02E-05 |
| rs6477309  | T | C | 0.666 | 0.035  | 0.006 | 3.78E-08 |
| rs2844016  | T | C | 0.294 | 0.031  | 0.007 | 3.86E-06 |
| rs308521   | T | C | 0.604 | 0.031  | 0.006 | 5.09E-07 |
| rs4878734  | A | T | 0.511 | 0.016  | 0.006 | 5.83E-03 |
| rs6560218  | T | C | 0.518 | -0.021 | 0.006 | 5.42E-04 |
| rs62553781 | T | C | 0.033 | -0.060 | 0.018 | 7.07E-04 |
| rs12378543 | T | C | 0.384 | -0.022 | 0.006 | 3.22E-04 |
| rs555784   | A | T | 0.380 | -0.029 | 0.006 | 3.69E-06 |
| rs295268   | T | C | 0.740 | -0.026 | 0.007 | 1.16E-04 |
| rs3138490  | A | T | 0.515 | 0.023  | 0.006 | 1.30E-04 |
| rs10759208 | T | C | 0.614 | -0.026 | 0.006 | 2.18E-05 |
| rs11788633 | C | G | 0.655 | 0.029  | 0.006 | 3.39E-06 |
| rs10818834 | T | C | 0.730 | 0.026  | 0.007 | 7.91E-05 |
| rs10988239 | T | C | 0.512 | -0.016 | 0.006 | 9.61E-03 |
| rs12380242 | T | C | 0.506 | -0.016 | 0.006 | 7.06E-03 |
| rs28458909 | T | C | 0.123 | -0.072 | 0.010 | 2.92E-12 |
| rs497338   | T | C | 0.288 | 0.029  | 0.007 | 6.46E-06 |
| rs66617308 | T | C | 0.671 | 0.017  | 0.006 | 7.89E-03 |
| rs9416744  | A | C | 0.260 | 0.044  | 0.007 | 8.45E-11 |
| rs11597421 | A | G | 0.497 | -0.026 | 0.006 | 2.39E-05 |
| rs12249410 | T | G | 0.108 | -0.031 | 0.010 | 1.40E-03 |
| rs17712705 | A | G | 0.327 | -0.029 | 0.006 | 5.73E-06 |
| rs2298117  | T | C | 0.448 | -0.018 | 0.006 | 2.75E-03 |
| rs10762434 | C | G | 0.775 | 0.033  | 0.007 | 3.68E-06 |
| rs2648721  | T | G | 0.704 | -0.021 | 0.007 | 1.29E-03 |
| rs11186842 | T | A | 0.277 | 0.027  | 0.007 | 4.36E-05 |
| rs1163238  | A | G | 0.389 | -0.018 | 0.006 | 2.86E-03 |
| rs7900191  | T | C | 0.404 | -0.018 | 0.006 | 3.20E-03 |

|            |   |   |       |        |       |          |
|------------|---|---|-------|--------|-------|----------|
| rs11200159 | A | C | 0.655 | -0.023 | 0.006 | 3.86E-04 |
| rs3808964  | T | G | 0.633 | 0.015  | 0.006 | 1.25E-02 |
| rs9664044  | T | C | 0.232 | -0.025 | 0.007 | 4.89E-04 |
| rs10830107 | A | G | 0.792 | 0.031  | 0.007 | 2.03E-05 |
| rs76518095 | T | C | 0.077 | 0.046  | 0.012 | 7.76E-05 |
| rs12771973 | A | G | 0.248 | -0.028 | 0.007 | 7.15E-05 |
| rs10832648 | A | C | 0.199 | -0.030 | 0.007 | 4.74E-05 |
| rs10742179 | A | G | 0.263 | 0.039  | 0.007 | 1.15E-08 |
| rs4923541  | T | C | 0.510 | 0.028  | 0.006 | 2.45E-06 |
| rs621421   | T | C | 0.626 | -0.029 | 0.006 | 3.09E-06 |
| rs11032362 | A | G | 0.094 | 0.079  | 0.010 | 3.79E-15 |
| rs7111582  | A | G | 0.896 | -0.048 | 0.010 | 8.68E-07 |
| rs10838687 | T | G | 0.792 | 0.045  | 0.007 | 1.12E-09 |
| rs12808544 | A | C | 0.241 | -0.034 | 0.007 | 8.82E-07 |
| rs662094   | A | G | 0.494 | 0.036  | 0.006 | 1.93E-09 |
| rs1278402  | A | G | 0.736 | 0.038  | 0.007 | 2.15E-08 |
| rs1508608  | A | G | 0.320 | 0.040  | 0.006 | 2.85E-10 |
| rs4121878  | C | G | 0.501 | 0.024  | 0.006 | 7.27E-05 |
| rs17577073 | A | C | 0.564 | 0.028  | 0.006 | 3.12E-06 |
| rs2514214  | A | G | 0.269 | 0.026  | 0.007 | 1.33E-04 |
| rs4936290  | A | C | 0.658 | -0.019 | 0.007 | 3.68E-03 |
| rs3867239  | A | G | 0.376 | 0.032  | 0.006 | 2.30E-07 |
| rs74357745 | A | G | 0.880 | 0.021  | 0.009 | 2.34E-02 |
| rs7943634  | T | C | 0.308 | -0.020 | 0.007 | 1.66E-03 |
| rs11062167 | A | G | 0.543 | 0.029  | 0.006 | 1.39E-06 |
| rs1799464  | A | G | 0.287 | -0.025 | 0.007 | 2.72E-04 |
| rs12298405 | T | C | 0.330 | -0.024 | 0.006 | 1.82E-04 |
| rs2433634  | A | C | 0.724 | -0.028 | 0.007 | 4.45E-05 |
| rs11611435 | T | C | 0.556 | 0.023  | 0.006 | 1.94E-04 |
| rs13377754 | T | C | 0.610 | 0.055  | 0.006 | 6.15E-19 |

|            |   |   |       |        |       |          |
|------------|---|---|-------|--------|-------|----------|
| rs1843888  | A | G | 0.543 | 0.060  | 0.006 | 1.46E-23 |
| rs247929   | C | G | 0.508 | 0.036  | 0.006 | 2.83E-09 |
| rs7975791  | T | C | 0.038 | 0.054  | 0.016 | 7.53E-04 |
| rs4761989  | T | C | 0.868 | -0.037 | 0.009 | 2.29E-05 |
| rs7299922  | A | G | 0.639 | 0.023  | 0.006 | 4.57E-04 |
| rs487722   | T | G | 0.208 | 0.026  | 0.008 | 6.98E-04 |
| rs10877962 | T | C | 0.408 | 0.049  | 0.006 | 8.23E-16 |
| rs711098   | A | C | 0.398 | 0.033  | 0.006 | 4.89E-08 |
| rs10777221 | T | C | 0.596 | -0.028 | 0.006 | 3.02E-06 |
| rs7304278  | A | G | 0.283 | -0.030 | 0.007 | 6.84E-06 |
| rs7298532  | T | C | 0.721 | 0.025  | 0.007 | 1.51E-04 |
| rs3955311  | T | C | 0.149 | 0.031  | 0.009 | 2.03E-04 |
| rs80097534 | T | G | 0.097 | -0.024 | 0.011 | 2.73E-02 |
| rs9597241  | A | C | 0.811 | 0.037  | 0.008 | 1.53E-06 |
| rs12871550 | A | G | 0.323 | 0.032  | 0.006 | 7.51E-07 |
| rs9571526  | T | G | 0.771 | -0.032 | 0.007 | 8.15E-06 |
| rs2593487  | A | G | 0.336 | -0.035 | 0.006 | 6.05E-08 |
| rs495593   | A | G | 0.738 | 0.032  | 0.007 | 1.94E-06 |
| rs45597035 | A | G | 0.647 | -0.023 | 0.006 | 3.06E-04 |
| rs9573980  | A | G | 0.966 | 0.150  | 0.017 | 1.36E-19 |
| rs1886205  | A | C | 0.760 | 0.034  | 0.007 | 1.50E-06 |
| rs9558942  | T | C | 0.672 | -0.032 | 0.006 | 4.05E-07 |
| rs3815983  | T | C | 0.360 | -0.025 | 0.006 | 9.23E-05 |
| rs1163628  | A | C | 0.857 | -0.033 | 0.009 | 9.68E-05 |
| rs61990287 | A | C | 0.274 | 0.027  | 0.007 | 8.34E-05 |
| rs2878172  | A | G | 0.569 | -0.030 | 0.006 | 8.50E-07 |
| rs962961   | T | C | 0.331 | -0.025 | 0.006 | 5.47E-05 |
| rs6573308  | T | C | 0.394 | 0.026  | 0.006 | 1.60E-05 |
| rs7143933  | T | G | 0.262 | 0.034  | 0.007 | 5.12E-07 |
| rs2978382  | T | C | 0.585 | 0.021  | 0.006 | 4.89E-04 |

|            |   |   |       |        |       |          |
|------------|---|---|-------|--------|-------|----------|
| rs4903203  | A | G | 0.324 | 0.027  | 0.006 | 2.79E-05 |
| rs12436039 | T | C | 0.880 | 0.048  | 0.009 | 1.59E-07 |
| rs4550384  | T | G | 0.758 | 0.028  | 0.007 | 8.03E-05 |
| rs710284   | T | C | 0.580 | 0.025  | 0.006 | 4.10E-05 |
| rs11845599 | A | G | 0.635 | -0.034 | 0.006 | 7.53E-08 |
| rs59986227 | C | G | 0.749 | -0.029 | 0.007 | 3.74E-05 |
| rs12442008 | T | C | 0.259 | 0.035  | 0.007 | 1.47E-07 |
| rs4775086  | A | G | 0.236 | -0.030 | 0.007 | 2.62E-05 |
| rs12442674 | A | C | 0.730 | 0.040  | 0.008 | 5.37E-07 |
| rs1873958  | A | G | 0.409 | 0.041  | 0.006 | 9.56E-12 |
| rs72773411 | A | G | 0.153 | 0.035  | 0.009 | 4.79E-05 |
| rs12445235 | C | G | 0.410 | -0.024 | 0.006 | 8.86E-05 |
| rs2304467  | C | G | 0.607 | -0.020 | 0.006 | 1.32E-03 |
| rs11641239 | T | C | 0.285 | 0.017  | 0.007 | 9.18E-03 |
| rs7203707  | A | C | 0.519 | -0.016 | 0.006 | 8.11E-03 |
| rs4785296  | C | G | 0.231 | 0.029  | 0.007 | 3.55E-05 |
| rs3743794  | A | G | 0.607 | -0.021 | 0.006 | 8.08E-04 |
| rs12927162 | A | G | 0.728 | 0.066  | 0.007 | 3.02E-22 |
| rs1421085  | T | C | 0.594 | -0.044 | 0.006 | 4.08E-13 |
| rs2550298  | T | C | 0.381 | -0.043 | 0.006 | 8.77E-12 |
| rs8044054  | T | C | 0.388 | 0.031  | 0.006 | 2.66E-07 |
| rs72790386 | T | G | 0.034 | 0.071  | 0.017 | 4.83E-05 |
| rs17604349 | A | G | 0.185 | -0.044 | 0.008 | 4.34E-09 |
| rs1061032  | T | G | 0.094 | 0.065  | 0.010 | 8.61E-11 |
| rs11545787 | A | G | 0.248 | -0.071 | 0.007 | 4.43E-23 |
| rs12950382 | A | G | 0.720 | 0.027  | 0.007 | 5.00E-05 |
| rs4365329  | A | T | 0.538 | -0.025 | 0.006 | 2.96E-05 |
| rs2011528  | T | C | 0.825 | -0.029 | 0.008 | 1.39E-04 |
| rs3760381  | A | G | 0.254 | 0.030  | 0.007 | 1.09E-05 |
| rs7225002  | A | G | 0.592 | -0.021 | 0.006 | 6.21E-04 |

|            |   |   |       |        |       |          |
|------------|---|---|-------|--------|-------|----------|
| rs12600452 | A | G | 0.202 | 0.034  | 0.008 | 5.54E-06 |
| rs12051    | A | G | 0.612 | -0.033 | 0.006 | 7.98E-08 |
| rs55846845 | A | G | 0.518 | -0.021 | 0.006 | 4.15E-04 |
| rs72829706 | A | G | 0.960 | 0.053  | 0.015 | 5.78E-04 |
| rs8072058  | A | T | 0.781 | -0.031 | 0.007 | 1.29E-05 |
| rs412000   | C | G | 0.555 | -0.025 | 0.006 | 2.91E-05 |
| rs58681483 | A | G | 0.918 | 0.055  | 0.010 | 1.23E-07 |
| rs72841368 | A | T | 0.810 | -0.030 | 0.008 | 6.64E-05 |
| rs2916148  | A | G | 0.452 | 0.033  | 0.006 | 6.69E-08 |
| rs2580160  | A | G | 0.555 | 0.024  | 0.006 | 5.76E-05 |
| rs62082402 | T | G | 0.194 | 0.060  | 0.011 | 5.25E-08 |
| rs1788784  | A | G | 0.344 | -0.043 | 0.006 | 1.14E-11 |
| rs1013987  | T | C | 0.403 | -0.022 | 0.006 | 3.31E-04 |
| rs4419127  | A | G | 0.662 | 0.060  | 0.006 | 1.13E-21 |
| rs9950528  | A | G | 0.651 | -0.025 | 0.006 | 5.33E-05 |
| rs12969848 | T | C | 0.531 | 0.036  | 0.006 | 1.37E-09 |
| rs9956387  | A | T | 0.495 | -0.018 | 0.006 | 2.62E-03 |
| rs4800998  | A | T | 0.183 | 0.057  | 0.008 | 4.56E-13 |
| rs9964420  | A | C | 0.298 | -0.064 | 0.007 | 1.42E-21 |
| rs11152350 | A | C | 0.467 | -0.029 | 0.006 | 1.13E-06 |
| rs34329963 | T | C | 0.113 | -0.039 | 0.010 | 3.84E-05 |
| rs1025601  | T | C | 0.386 | -0.016 | 0.006 | 7.61E-03 |
| rs10402849 | T | C | 0.200 | 0.020  | 0.008 | 7.23E-03 |
| rs36055559 | A | G | 0.166 | -0.046 | 0.010 | 9.49E-06 |
| rs7248205  | T | C | 0.600 | 0.032  | 0.006 | 2.90E-07 |
| rs9636202  | A | G | 0.266 | -0.023 | 0.007 | 8.26E-04 |
| rs73026775 | A | G | 0.125 | -0.041 | 0.010 | 7.89E-05 |
| rs4804951  | A | G | 0.331 | 0.021  | 0.006 | 1.02E-03 |
| rs56113850 | T | C | 0.423 | -0.031 | 0.006 | 4.30E-07 |
| rs58876439 | A | G | 0.067 | 0.053  | 0.012 | 9.84E-06 |

|             |   |   |       |        |       |          |
|-------------|---|---|-------|--------|-------|----------|
| rs11670534  | T | C | 0.161 | -0.026 | 0.008 | 1.61E-03 |
| rs6131805   | T | G | 0.402 | 0.026  | 0.006 | 2.56E-05 |
| rs6131942   | A | G | 0.418 | -0.033 | 0.006 | 4.93E-08 |
| rs1474754   | A | G | 0.264 | -0.029 | 0.007 | 2.22E-05 |
| rs6047481   | A | T | 0.671 | 0.025  | 0.006 | 9.85E-05 |
| rs1737893   | T | C | 0.381 | -0.028 | 0.006 | 6.11E-06 |
| rs2072727   | T | C | 0.433 | 0.033  | 0.006 | 3.01E-08 |
| rs57236847  | C | G | 0.603 | 0.030  | 0.006 | 1.09E-06 |
| rs695459    | T | C | 0.391 | -0.019 | 0.006 | 1.66E-03 |
| rs28459838  | T | C | 0.237 | 0.032  | 0.008 | 2.13E-05 |
| rs118047999 | C | G | 0.246 | 0.036  | 0.007 | 2.97E-07 |
| rs139911    | T | C | 0.572 | -0.024 | 0.006 | 5.10E-05 |
| rs9611597   | A | T | 0.837 | 0.040  | 0.009 | 2.32E-06 |
| rs6007594   | A | G | 0.264 | -0.026 | 0.007 | 1.39E-04 |

**eTable 2. Lead variants associated with diurnal preference that were not available in the PGC-UKB MDD GWAS ('Original SNP') and identified proxy SNP. 'NA' is listed when no proxies meeting our criteria were identified.**

| Original SNP | Proxy SNP  | r2 value |
|--------------|------------|----------|
| rs2506089    | NA         | NA       |
| rs77248969   | NA         | NA       |
| rs41290656   | NA         | NA       |
| rs111867612  | rs35588117 | 0.94     |
| rs12518401   | NA         | NA       |
| rs486416     | rs605203   | 1        |
| rs9496623    | rs9496643  | 0.99     |
| rs2396719    | rs6961970  | 0.98     |
| rs2072413    | NA         | NA       |
| rs28458909   | NA         | NA       |
| rs61875203   | rs11186842 | 0.99     |
| rs3782860    | rs11062167 | 0.92     |
| rs7959983    | rs10777221 | 0.92     |
| rs7225002    | NA         | NA       |
| rs36055559   | NA         | NA       |



**eTable 3. Associations of available diurnal preference genetic variants with major depressive disorder in the PGC-UKB meta-analysis.** EA: effect allele; OA: other allele

| SNP        | EA | OA | EA frequency | Beta   | Standard error | P value  |
|------------|----|----|--------------|--------|----------------|----------|
| rs2072727  | T  | C  | 0.437        | 0.001  | 0.004          | 8.38E-01 |
| rs17575798 | A  | G  | 0.192        | -0.001 | 0.005          | 8.59E-01 |
| rs6816922  | A  | C  | 0.538        | -0.016 | 0.004          | 1.65E-04 |
| rs6429233  | A  | G  | 0.457        | -0.006 | 0.004          | 1.58E-01 |
| rs2737245  | T  | G  | 0.279        | -0.002 | 0.005          | 6.36E-01 |
| rs766406   | T  | G  | 0.633        | -0.013 | 0.004          | 4.23E-03 |
| rs6690292  | T  | C  | 0.728        | 0.001  | 0.005          | 8.58E-01 |
| rs11845599 | A  | G  | 0.633        | 0.000  | 0.005          | 9.90E-01 |
| rs605203   | A  | C  | 0.648        | 0.018  | 0.005          | 5.79E-05 |
| rs1843888  | A  | G  | 0.547        | -0.011 | 0.004          | 1.12E-02 |
| rs10109566 | A  | G  | 0.489        | 0.019  | 0.004          | 1.66E-05 |
| rs2944831  | A  | G  | 0.296        | -0.005 | 0.005          | 3.20E-01 |
| rs62182135 | A  | C  | 0.329        | 0.008  | 0.005          | 9.43E-02 |
| rs4550782  | T  | G  | 0.667        | -0.001 | 0.005          | 8.25E-01 |
| rs9636202  | A  | G  | 0.268        | -0.018 | 0.005          | 3.45E-04 |
| rs4878734  | A  | T  | 0.514        | 0.002  | 0.004          | 6.38E-01 |
| rs1508608  | A  | G  | 0.321        | 0.006  | 0.005          | 1.99E-01 |
| rs12298405 | T  | C  | 0.326        | 0.006  | 0.005          | 1.72E-01 |
| rs11032362 | A  | G  | 0.093        | 0.003  | 0.007          | 6.58E-01 |
| rs4269995  | T  | C  | 0.251        | 0.016  | 0.005          | 9.50E-04 |
| rs495593   | A  | G  | 0.742        | 0.002  | 0.005          | 7.59E-01 |
| rs11788633 | C  | G  | 0.651        | 0.007  | 0.005          | 1.04E-01 |
| rs2881955  | T  | C  | 0.279        | -0.003 | 0.005          | 5.15E-01 |
| rs4241964  | T  | G  | 0.525        | 0.001  | 0.004          | 7.63E-01 |
| rs10742179 | A  | G  | 0.262        | 0.015  | 0.005          | 2.10E-03 |
| rs75120545 | T  | C  | 0.033        | 0.011  | 0.013          | 4.04E-01 |

|             |   |   |       |        |       |          |
|-------------|---|---|-------|--------|-------|----------|
| rs12600452  | A | G | 0.204 | 0.010  | 0.005 | 5.99E-02 |
| rs848552    | C | G | 0.474 | 0.000  | 0.004 | 9.64E-01 |
| rs12808544  | A | C | 0.241 | 0.006  | 0.005 | 2.66E-01 |
| rs1163238   | A | G | 0.390 | 0.006  | 0.004 | 1.89E-01 |
| rs11186842  | A | T | 0.724 | -0.005 | 0.005 | 3.06E-01 |
| rs497338    | T | C | 0.285 | 0.001  | 0.005 | 8.76E-01 |
| rs17604349  | A | G | 0.180 | 0.013  | 0.006 | 2.51E-02 |
| rs72950188  | T | C | 0.925 | -0.001 | 0.008 | 9.35E-01 |
| rs13203140  | T | C | 0.640 | 0.002  | 0.005 | 7.25E-01 |
| rs7111582   | A | G | 0.897 | -0.005 | 0.007 | 5.22E-01 |
| rs66617308  | T | C | 0.671 | -0.006 | 0.005 | 1.92E-01 |
| rs12140153  | T | G | 0.094 | 0.000  | 0.008 | 9.74E-01 |
| rs812925    | C | G | 0.646 | -0.005 | 0.005 | 2.96E-01 |
| rs3923809   | A | G | 0.694 | -0.006 | 0.005 | 2.08E-01 |
| rs1221502   | A | C | 0.738 | 0.011  | 0.005 | 2.19E-02 |
| rs60616179  | A | G | 0.944 | -0.009 | 0.010 | 3.47E-01 |
| rs2653349   | A | G | 0.212 | -0.005 | 0.005 | 3.65E-01 |
| rs12442674  | A | C | 0.728 | -0.013 | 0.005 | 9.53E-03 |
| rs35346733  | A | G | 0.194 | 0.007  | 0.006 | 1.83E-01 |
| rs149611468 | T | C | 0.989 | 0.032  | 0.021 | 1.36E-01 |
| rs6440833   | A | G | 0.463 | -0.014 | 0.004 | 1.21E-03 |
| rs962961    | T | C | 0.329 | -0.017 | 0.005 | 1.87E-04 |
| rs7304278   | A | G | 0.279 | 0.005  | 0.005 | 3.53E-01 |
| rs6047481   | A | T | 0.671 | 0.011  | 0.005 | 2.02E-02 |
| rs12051     | A | G | 0.611 | 0.004  | 0.004 | 3.40E-01 |
| rs17302081  | T | C | 0.442 | 0.004  | 0.004 | 3.93E-01 |
| rs5016898   | T | C | 0.427 | 0.005  | 0.004 | 2.33E-01 |
| rs62082402  | T | G | 0.194 | -0.002 | 0.006 | 7.22E-01 |
| rs412000    | C | G | 0.555 | -0.001 | 0.004 | 8.23E-01 |
| rs4027217   | A | C | 0.213 | 0.009  | 0.005 | 8.66E-02 |

|             |   |   |       |        |       |          |
|-------------|---|---|-------|--------|-------|----------|
| rs118047999 | C | G | 0.252 | -0.008 | 0.005 | 1.04E-01 |
| rs62553781  | T | C | 0.034 | 0.008  | 0.012 | 4.79E-01 |
| rs3867239   | A | G | 0.378 | -0.011 | 0.004 | 1.17E-02 |
| rs4236237   | A | C | 0.596 | 0.006  | 0.004 | 1.44E-01 |
| rs1144566   | T | C | 0.030 | 0.006  | 0.013 | 6.53E-01 |
| rs6958557   | T | G | 0.609 | 0.003  | 0.004 | 5.00E-01 |
| rs6968240   | A | C | 0.426 | 0.000  | 0.004 | 9.34E-01 |
| rs9950528   | A | G | 0.652 | 0.015  | 0.005 | 1.17E-03 |
| rs7299922   | A | G | 0.633 | 0.001  | 0.005 | 8.19E-01 |
| rs35524253  | A | G | 0.357 | -0.002 | 0.005 | 7.39E-01 |
| rs1468945   | A | G | 0.786 | -0.002 | 0.005 | 7.12E-01 |
| rs6560218   | T | C | 0.518 | 0.001  | 0.004 | 8.66E-01 |
| rs6988733   | T | C | 0.349 | -0.005 | 0.005 | 2.54E-01 |
| rs2396004   | A | G | 0.435 | 0.003  | 0.004 | 4.52E-01 |
| rs6718511   | A | G | 0.557 | -0.010 | 0.004 | 2.79E-02 |
| rs1474754   | A | G | 0.265 | -0.001 | 0.005 | 8.10E-01 |
| rs62465218  | A | C | 0.148 | 0.009  | 0.006 | 1.55E-01 |
| rs10951325  | T | C | 0.635 | -0.011 | 0.005 | 1.74E-02 |
| rs11678584  | A | T | 0.861 | -0.004 | 0.006 | 5.75E-01 |
| rs10058356  | T | C | 0.697 | 0.002  | 0.005 | 6.94E-01 |
| rs13065394  | T | G | 0.289 | 0.003  | 0.005 | 5.64E-01 |
| rs711098    | A | C | 0.403 | 0.005  | 0.004 | 2.73E-01 |
| rs621421    | T | C | 0.623 | -0.005 | 0.004 | 2.76E-01 |
| rs1013987   | T | C | 0.407 | 0.000  | 0.004 | 9.26E-01 |
| rs9479402   | T | C | 0.990 | 0.018  | 0.022 | 4.14E-01 |
| rs1025601   | T | C | 0.386 | -0.008 | 0.005 | 6.04E-02 |
| rs7143933   | T | G | 0.265 | 0.001  | 0.005 | 9.08E-01 |
| rs9956387   | A | T | 0.495 | -0.001 | 0.004 | 8.50E-01 |
| rs7649164   | T | G | 0.576 | -0.002 | 0.005 | 6.09E-01 |
| rs2050185   | A | G | 0.628 | -0.019 | 0.005 | 1.53E-05 |

|             |   |   |       |        |       |          |
|-------------|---|---|-------|--------|-------|----------|
| rs72729847  | T | C | 0.802 | -0.006 | 0.005 | 2.56E-01 |
| rs6794796   | A | G | 0.288 | 0.004  | 0.005 | 4.32E-01 |
| rs4535583   | T | C | 0.692 | -0.003 | 0.005 | 4.85E-01 |
| rs6838677   | A | C | 0.672 | 0.002  | 0.005 | 7.18E-01 |
| rs3815983   | T | C | 0.360 | 0.007  | 0.005 | 1.46E-01 |
| rs11062167  | A | G | 0.535 | -0.001 | 0.004 | 7.63E-01 |
| rs12445235  | C | G | 0.409 | 0.001  | 0.004 | 8.97E-01 |
| rs74357745  | A | G | 0.880 | 0.018  | 0.007 | 6.27E-03 |
| rs10988239  | T | C | 0.508 | -0.002 | 0.004 | 5.82E-01 |
| rs115073088 | A | G | 0.976 | 0.014  | 0.014 | 3.39E-01 |
| rs481214    | A | T | 0.604 | 0.003  | 0.005 | 5.40E-01 |
| rs7626335   | A | C | 0.331 | 0.001  | 0.005 | 8.19E-01 |
| rs12436039  | T | C | 0.880 | 0.003  | 0.007 | 7.03E-01 |
| rs11165655  | A | G | 0.526 | 0.020  | 0.004 | 4.25E-06 |
| rs73050286  | T | C | 0.782 | -0.003 | 0.005 | 6.32E-01 |
| rs2550298   | T | C | 0.380 | 0.012  | 0.005 | 5.93E-03 |
| rs9436119   | A | G | 0.390 | -0.006 | 0.004 | 1.66E-01 |
| rs80097534  | T | G | 0.100 | -0.010 | 0.007 | 1.53E-01 |
| rs2878172   | A | G | 0.570 | -0.002 | 0.004 | 6.69E-01 |
| rs34967119  | A | G | 0.495 | 0.001  | 0.004 | 7.51E-01 |
| rs10830107  | A | G | 0.797 | -0.003 | 0.005 | 6.19E-01 |
| rs11681299  | T | C | 0.287 | -0.008 | 0.005 | 1.03E-01 |
| rs1163628   | A | C | 0.857 | -0.006 | 0.006 | 3.14E-01 |
| rs9496643   | A | G | 0.291 | 0.000  | 0.005 | 9.30E-01 |
| rs11152350  | A | C | 0.467 | -0.010 | 0.004 | 2.72E-02 |
| rs13377754  | T | C | 0.611 | -0.012 | 0.004 | 5.05E-03 |
| rs12464387  | A | G | 0.468 | 0.012  | 0.004 | 8.03E-03 |
| rs9836621   | T | C | 0.520 | 0.000  | 0.004 | 9.73E-01 |
| rs2593487   | A | G | 0.337 | 0.011  | 0.005 | 1.72E-02 |
| rs10832648  | A | C | 0.197 | -0.003 | 0.005 | 6.01E-01 |

|             |   |   |       |        |       |          |
|-------------|---|---|-------|--------|-------|----------|
| rs73026775  | A | G | 0.127 | -0.005 | 0.007 | 4.21E-01 |
| rs77960     | A | G | 0.327 | 0.036  | 0.005 | 2.36E-15 |
| rs17396357  | T | C | 0.379 | 0.000  | 0.004 | 9.33E-01 |
| rs9347926   | A | T | 0.445 | -0.010 | 0.004 | 2.30E-02 |
| rs2850979   | T | C | 0.761 | 0.000  | 0.005 | 9.92E-01 |
| rs2166559   | T | C | 0.861 | -0.015 | 0.006 | 1.42E-02 |
| rs11611435  | T | C | 0.554 | 0.003  | 0.004 | 4.77E-01 |
| rs72720396  | A | G | 0.770 | 0.006  | 0.005 | 2.71E-01 |
| rs2433634   | A | C | 0.721 | -0.011 | 0.005 | 2.05E-02 |
| rs4800998   | A | T | 0.186 | -0.021 | 0.006 | 2.07E-04 |
| rs80271258  | T | C | 0.086 | 0.010  | 0.008 | 1.75E-01 |
| rs6477309   | T | C | 0.665 | 0.013  | 0.005 | 5.65E-03 |
| rs6573308   | T | C | 0.391 | -0.003 | 0.004 | 5.39E-01 |
| rs4761989   | T | C | 0.867 | 0.002  | 0.006 | 7.34E-01 |
| rs34509802  | A | G | 0.178 | 0.002  | 0.006 | 7.78E-01 |
| rs10402849  | T | C | 0.203 | 0.003  | 0.005 | 6.48E-01 |
| rs2580160   | A | G | 0.553 | -0.003 | 0.004 | 4.78E-01 |
| rs9416744   | A | C | 0.258 | -0.009 | 0.005 | 5.61E-02 |
| rs1800828   | C | G | 0.749 | 0.010  | 0.005 | 3.63E-02 |
| rs9571526   | T | G | 0.769 | 0.012  | 0.005 | 2.10E-02 |
| rs2648721   | T | G | 0.703 | -0.001 | 0.005 | 8.62E-01 |
| rs9997394   | A | G | 0.291 | -0.001 | 0.005 | 8.22E-01 |
| rs7943634   | T | C | 0.310 | 0.013  | 0.005 | 6.19E-03 |
| rs4657983   | A | G | 0.653 | 0.007  | 0.005 | 1.37E-01 |
| rs1061032   | T | G | 0.091 | -0.014 | 0.008 | 6.51E-02 |
| rs184033703 | A | G | 0.057 | 0.002  | 0.009 | 8.58E-01 |
| rs59986227  | C | G | 0.745 | -0.008 | 0.005 | 9.57E-02 |
| rs13172141  | A | T | 0.567 | -0.003 | 0.004 | 5.69E-01 |
| rs12636669  | T | C | 0.080 | 0.015  | 0.008 | 6.69E-02 |
| rs12871550  | A | G | 0.320 | 0.012  | 0.005 | 7.92E-03 |

|            |   |   |       |        |       |          |
|------------|---|---|-------|--------|-------|----------|
| rs2298117  | T | C | 0.452 | -0.001 | 0.004 | 8.00E-01 |
| rs3955311  | T | C | 0.149 | 0.017  | 0.006 | 4.80E-03 |
| rs139911   | T | C | 0.578 | 0.018  | 0.004 | 3.50E-05 |
| rs247929   | C | G | 0.507 | 0.005  | 0.004 | 2.38E-01 |
| rs1599374  | A | G | 0.514 | -0.001 | 0.004 | 9.10E-01 |
| rs8072058  | A | T | 0.782 | -0.002 | 0.005 | 7.18E-01 |
| rs4860734  | A | G | 0.287 | 0.009  | 0.005 | 5.80E-02 |
| rs12195792 | A | T | 0.273 | -0.004 | 0.005 | 3.63E-01 |
| rs4672458  | T | C | 0.474 | 0.003  | 0.004 | 4.97E-01 |
| rs12771973 | A | G | 0.250 | -0.007 | 0.005 | 1.39E-01 |
| rs42210    | C | G | 0.710 | -0.004 | 0.005 | 4.19E-01 |
| rs9573980  | A | G | 0.966 | 0.010  | 0.012 | 4.21E-01 |
| rs11545787 | A | G | 0.248 | 0.010  | 0.005 | 6.11E-02 |
| rs34329963 | T | C | 0.114 | 0.003  | 0.007 | 6.83E-01 |
| rs57236847 | C | G | 0.604 | -0.005 | 0.004 | 2.46E-01 |
| rs1421085  | T | C | 0.594 | -0.010 | 0.004 | 2.01E-02 |
| rs7975791  | T | C | 0.039 | -0.006 | 0.011 | 5.88E-01 |
| rs7298532  | T | C | 0.718 | -0.009 | 0.005 | 7.59E-02 |
| rs7006885  | A | G | 0.288 | -0.006 | 0.005 | 2.44E-01 |
| rs359248   | T | G | 0.456 | -0.015 | 0.004 | 5.65E-04 |
| rs187028   | A | T | 0.316 | -0.001 | 0.005 | 8.23E-01 |
| rs9381812  | A | G | 0.703 | 0.007  | 0.005 | 1.43E-01 |
| rs6131942  | A | G | 0.420 | -0.010 | 0.004 | 1.90E-02 |
| rs17455138 | T | C | 0.767 | 0.002  | 0.005 | 6.42E-01 |
| rs4923541  | T | C | 0.508 | 0.010  | 0.004 | 1.85E-02 |
| rs4666682  | A | G | 0.178 | 0.003  | 0.006 | 5.78E-01 |
| rs7203707  | A | C | 0.520 | -0.002 | 0.004 | 7.00E-01 |
| rs9611597  | A | T | 0.840 | 0.010  | 0.006 | 9.45E-02 |
| rs12470914 | A | T | 0.100 | 0.003  | 0.007 | 6.97E-01 |
| rs61990287 | A | C | 0.277 | -0.021 | 0.005 | 1.23E-05 |

|             |   |   |       |        |       |          |
|-------------|---|---|-------|--------|-------|----------|
| rs2916148   | A | G | 0.453 | 0.007  | 0.004 | 9.36E-02 |
| rs3857599   | A | C | 0.165 | 0.005  | 0.006 | 4.32E-01 |
| rs1559253   | A | G | 0.358 | -0.004 | 0.005 | 3.85E-01 |
| rs76064513  | T | C | 0.131 | -0.005 | 0.007 | 4.23E-01 |
| rs4365329   | A | T | 0.541 | 0.003  | 0.004 | 4.75E-01 |
| rs111261826 | A | C | 0.679 | 0.011  | 0.005 | 1.46E-02 |
| rs76518095  | T | C | 0.076 | 0.006  | 0.008 | 4.88E-01 |
| rs9817910   | A | G | 0.561 | -0.002 | 0.004 | 7.15E-01 |
| rs2979139   | A | G | 0.505 | 0.012  | 0.005 | 7.00E-03 |
| rs1931814   | A | G | 0.478 | -0.006 | 0.004 | 1.95E-01 |
| rs7602499   | T | C | 0.352 | 0.004  | 0.005 | 4.34E-01 |
| rs555784    | A | T | 0.381 | 0.002  | 0.005 | 6.45E-01 |
| rs3743794   | A | G | 0.605 | -0.008 | 0.004 | 8.38E-02 |
| rs62124718  | A | G | 0.895 | 0.000  | 0.007 | 9.84E-01 |
| rs3807651   | A | T | 0.491 | -0.003 | 0.004 | 4.92E-01 |
| rs2304467   | C | G | 0.602 | -0.002 | 0.004 | 6.90E-01 |
| rs11677484  | T | G | 0.257 | -0.014 | 0.005 | 5.83E-03 |
| rs6007594   | A | G | 0.261 | -0.009 | 0.005 | 7.90E-02 |
| rs975025    | T | C | 0.076 | -0.004 | 0.008 | 6.33E-01 |
| rs62479736  | T | G | 0.292 | -0.004 | 0.005 | 4.52E-01 |
| rs6967481   | T | C | 0.497 | 0.002  | 0.004 | 6.82E-01 |
| rs13414393  | T | C | 0.540 | -0.002 | 0.004 | 7.34E-01 |
| rs4785296   | C | G | 0.235 | -0.009 | 0.005 | 6.56E-02 |
| rs10520176  | T | C | 0.498 | -0.003 | 0.004 | 4.30E-01 |
| rs35588117  | A | G | 0.105 | -0.011 | 0.007 | 1.17E-01 |
| rs10777221  | T | C | 0.603 | 0.000  | 0.004 | 9.82E-01 |
| rs7845620   | A | C | 0.836 | -0.003 | 0.006 | 5.99E-01 |
| rs72841368  | A | T | 0.811 | 0.002  | 0.006 | 7.87E-01 |
| rs66507804  | T | C | 0.797 | -0.005 | 0.005 | 3.63E-01 |
| rs17577073  | A | C | 0.567 | 0.006  | 0.004 | 1.64E-01 |

|             |   |   |       |        |       |          |
|-------------|---|---|-------|--------|-------|----------|
| rs3760381   | A | G | 0.252 | 0.006  | 0.005 | 2.06E-01 |
| rs72773411  | A | G | 0.153 | 0.006  | 0.006 | 3.26E-01 |
| rs301218    | A | G | 0.392 | 0.004  | 0.004 | 3.94E-01 |
| rs10762434  | C | G | 0.776 | -0.002 | 0.005 | 7.39E-01 |
| rs71523448  | C | G | 0.080 | 0.021  | 0.008 | 1.02E-02 |
| rs10917513  | T | C | 0.652 | -0.007 | 0.005 | 1.02E-01 |
| rs12969848  | T | C | 0.532 | -0.007 | 0.004 | 1.04E-01 |
| rs4775086   | A | G | 0.240 | 0.006  | 0.005 | 2.17E-01 |
| rs710284    | T | C | 0.584 | 0.002  | 0.004 | 6.58E-01 |
| rs11154718  | T | C | 0.428 | 0.000  | 0.004 | 9.77E-01 |
| rs662094    | A | G | 0.493 | -0.020 | 0.004 | 4.23E-06 |
| rs28380327  | A | T | 0.630 | 0.013  | 0.004 | 3.96E-03 |
| rs3850174   | A | T | 0.256 | 0.003  | 0.005 | 5.15E-01 |
| rs58681483  | A | G | 0.920 | -0.014 | 0.008 | 8.38E-02 |
| rs67988891  | C | G | 0.680 | 0.002  | 0.005 | 6.33E-01 |
| rs6846730   | T | C | 0.235 | -0.006 | 0.005 | 2.08E-01 |
| rs112201801 | T | C | 0.923 | 0.009  | 0.008 | 2.88E-01 |
| rs1449403   | A | G | 0.122 | -0.008 | 0.007 | 2.25E-01 |
| rs2514214   | A | G | 0.268 | 0.005  | 0.005 | 3.13E-01 |
| rs56113850  | T | C | 0.424 | 0.006  | 0.004 | 2.03E-01 |
| rs11641239  | T | C | 0.287 | 0.000  | 0.005 | 9.36E-01 |
| rs11597421  | A | G | 0.499 | 0.009  | 0.004 | 3.92E-02 |
| rs72966564  | T | C | 0.248 | -0.001 | 0.005 | 8.41E-01 |
| rs9394154   | C | G | 0.434 | -0.003 | 0.004 | 5.39E-01 |
| rs10818834  | T | C | 0.731 | -0.016 | 0.005 | 8.62E-04 |
| rs9476310   | T | C | 0.511 | -0.005 | 0.004 | 2.25E-01 |
| rs8044054   | T | C | 0.389 | -0.017 | 0.004 | 8.33E-05 |
| rs9558942   | T | C | 0.675 | 0.006  | 0.005 | 2.15E-01 |
| rs2706762   | T | C | 0.150 | -0.007 | 0.006 | 2.33E-01 |
| rs9465253   | T | C | 0.279 | -0.003 | 0.005 | 5.79E-01 |



|            |   |   |       |        |       |          |
|------------|---|---|-------|--------|-------|----------|
| rs12927162 | A | G | 0.727 | -0.002 | 0.005 | 6.35E-01 |
| rs695459   | T | C | 0.389 | -0.018 | 0.004 | 6.25E-05 |
| rs17448682 | T | C | 0.235 | 0.002  | 0.005 | 7.10E-01 |
| rs12065331 | T | C | 0.310 | 0.004  | 0.005 | 4.31E-01 |
| rs2322605  | A | G | 0.475 | 0.000  | 0.004 | 9.60E-01 |
| rs7721608  | T | G | 0.466 | 0.000  | 0.004 | 9.68E-01 |
| rs2844016  | T | C | 0.294 | -0.004 | 0.005 | 4.07E-01 |
| rs12442008 | T | C | 0.254 | -0.005 | 0.005 | 2.98E-01 |
| rs9964420  | A | C | 0.302 | -0.006 | 0.005 | 2.02E-01 |
| rs308521   | T | C | 0.602 | 0.017  | 0.004 | 1.47E-04 |
| rs11670534 | T | C | 0.164 | -0.004 | 0.006 | 5.50E-01 |
| rs4936290  | A | C | 0.654 | -0.005 | 0.005 | 3.24E-01 |
| rs2901796  | A | G | 0.396 | -0.002 | 0.004 | 6.07E-01 |
| rs4690085  | A | G | 0.532 | 0.013  | 0.005 | 3.53E-03 |
| rs6727752  | A | G | 0.364 | -0.002 | 0.005 | 6.66E-01 |
| rs6993892  | T | C | 0.613 | 0.004  | 0.004 | 3.34E-01 |
| rs3796618  | A | T | 0.530 | 0.003  | 0.005 | 5.76E-01 |
| rs3138490  | A | T | 0.518 | -0.007 | 0.004 | 8.86E-02 |
| rs4121878  | C | G | 0.504 | 0.001  | 0.004 | 8.84E-01 |
| rs1737893  | T | C | 0.385 | 0.012  | 0.004 | 9.03E-03 |
| rs10916892 | T | C | 0.624 | 0.015  | 0.005 | 8.82E-04 |
| rs9991917  | A | T | 0.193 | -0.002 | 0.006 | 7.31E-01 |
| rs4698678  | C | G | 0.279 | 0.000  | 0.005 | 9.75E-01 |
| rs2362775  | T | C | 0.531 | -0.009 | 0.004 | 3.30E-02 |
| rs9348050  | T | C | 0.487 | 0.005  | 0.004 | 2.51E-01 |
| rs45597035 | A | G | 0.649 | -0.005 | 0.005 | 2.94E-01 |
| rs6544906  | A | C | 0.563 | -0.008 | 0.004 | 7.15E-02 |
| rs4550384  | T | G | 0.755 | 0.009  | 0.005 | 8.47E-02 |
| rs17712705 | A | G | 0.330 | 0.016  | 0.005 | 4.08E-04 |
| rs11102807 | A | G | 0.539 | -0.009 | 0.004 | 4.37E-02 |

|             |   |   |       |        |       |          |
|-------------|---|---|-------|--------|-------|----------|
| rs1811899   | T | C | 0.792 | -0.015 | 0.005 | 3.93E-03 |
| rs28459838  | T | C | 0.236 | -0.008 | 0.005 | 1.53E-01 |
| rs6468316   | T | C | 0.472 | -0.007 | 0.004 | 1.25E-01 |
| rs72829706  | A | G | 0.961 | -0.005 | 0.011 | 6.36E-01 |
| rs9597241   | A | C | 0.810 | -0.014 | 0.006 | 8.73E-03 |
| rs10175975  | T | C | 0.184 | 0.007  | 0.006 | 2.38E-01 |
| rs4729854   | A | T | 0.479 | -0.001 | 0.005 | 7.64E-01 |
| rs3100052   | A | G | 0.388 | 0.003  | 0.004 | 4.52E-01 |
| rs72796401  | A | T | 0.188 | 0.004  | 0.006 | 4.35E-01 |
| rs58876439  | A | G | 0.069 | -0.001 | 0.009 | 9.41E-01 |
| rs113161209 | A | G | 0.074 | -0.007 | 0.008 | 4.22E-01 |
| rs7900191   | T | C | 0.403 | 0.002  | 0.004 | 6.06E-01 |
| rs12380242  | T | C | 0.506 | 0.004  | 0.004 | 4.17E-01 |
| rs7248205   | T | C | 0.597 | 0.006  | 0.004 | 1.81E-01 |
| rs1886205   | A | C | 0.759 | -0.018 | 0.005 | 5.32E-04 |
| rs13011556  | C | G | 0.761 | 0.003  | 0.005 | 5.05E-01 |
| rs10759208  | T | C | 0.610 | 0.010  | 0.004 | 2.28E-02 |
| rs1799464   | A | G | 0.290 | 0.001  | 0.005 | 8.60E-01 |
| rs747003    | T | C | 0.607 | -0.004 | 0.004 | 3.24E-01 |
| rs55846845  | A | G | 0.519 | 0.005  | 0.004 | 2.67E-01 |
| rs114848860 | A | T | 0.974 | 0.004  | 0.014 | 7.69E-01 |
| rs3808964   | T | G | 0.634 | -0.012 | 0.005 | 5.37E-03 |
| rs10877962  | T | C | 0.412 | -0.006 | 0.004 | 1.69E-01 |
| rs17007397  | C | G | 0.576 | 0.009  | 0.004 | 4.10E-02 |
| rs11200159  | A | C | 0.654 | -0.001 | 0.005 | 9.10E-01 |
| rs61773390  | T | G | 0.194 | -0.007 | 0.005 | 1.87E-01 |
| rs4804951   | A | G | 0.331 | -0.008 | 0.005 | 9.13E-02 |
| rs2011528   | T | C | 0.828 | 0.001  | 0.006 | 9.11E-01 |
| rs9664044   | T | C | 0.231 | -0.004 | 0.005 | 4.19E-01 |
| rs938836    | A | G | 0.467 | 0.000  | 0.004 | 9.94E-01 |

|             |   |   |       |        |       |          |
|-------------|---|---|-------|--------|-------|----------|
| rs1871729   | A | G | 0.685 | -0.003 | 0.005 | 5.09E-01 |
| rs72790386  | T | G | 0.033 | -0.026 | 0.012 | 3.14E-02 |
| rs465670    | T | C | 0.542 | 0.002  | 0.004 | 7.20E-01 |
| rs12206814  | C | G | 0.493 | 0.000  | 0.005 | 9.62E-01 |
| rs7701529   | A | T | 0.238 | -0.001 | 0.005 | 8.72E-01 |
| rs10254050  | C | G | 0.189 | -0.001 | 0.006 | 8.13E-01 |
| rs34054660  | A | G | 0.576 | -0.011 | 0.004 | 1.53E-02 |
| rs10237162  | T | C | 0.725 | 0.004  | 0.005 | 4.32E-01 |
| rs16939162  | A | G | 0.832 | -0.014 | 0.006 | 1.91E-02 |
| rs6433478   | T | C | 0.460 | -0.001 | 0.004 | 8.51E-01 |
| rs1278402   | A | G | 0.735 | -0.002 | 0.005 | 7.42E-01 |
| rs12631477  | T | C | 0.798 | -0.003 | 0.005 | 5.78E-01 |
| rs7700110   | A | G | 0.257 | -0.013 | 0.005 | 9.59E-03 |
| rs10838687  | T | G | 0.789 | 0.002  | 0.005 | 6.95E-01 |
| rs4419127   | A | G | 0.662 | -0.002 | 0.005 | 6.36E-01 |
| rs113851554 | T | G | 0.057 | -0.001 | 0.010 | 9.46E-01 |
| rs6961970   | A | C | 0.242 | 0.014  | 0.005 | 4.85E-03 |
| rs1873958   | A | G | 0.408 | 0.003  | 0.004 | 4.77E-01 |
| rs909757    | T | C | 0.632 | 0.004  | 0.005 | 4.25E-01 |
| rs13004345  | T | C | 0.653 | -0.004 | 0.005 | 4.03E-01 |
| rs1788784   | A | G | 0.350 | -0.005 | 0.005 | 2.62E-01 |
| rs17140201  | A | G | 0.175 | 0.005  | 0.006 | 4.25E-01 |
| rs6665637   | A | G | 0.285 | 0.007  | 0.005 | 1.84E-01 |
| rs12378543  | T | C | 0.384 | 0.003  | 0.004 | 5.14E-01 |
| rs1398346   | T | C | 0.869 | -0.001 | 0.006 | 8.30E-01 |
| rs1064213   | A | G | 0.481 | -0.004 | 0.004 | 3.35E-01 |
| rs7429614   | T | G | 0.417 | -0.006 | 0.004 | 1.81E-01 |
| rs12249410  | T | G | 0.108 | 0.010  | 0.007 | 1.55E-01 |
| rs12950382  | A | G | 0.721 | 0.000  | 0.005 | 9.37E-01 |
| rs12040629  | A | G | 0.161 | 0.003  | 0.006 | 6.22E-01 |

|            |   |   |       |        |       |          |
|------------|---|---|-------|--------|-------|----------|
| rs11588913 | A | G | 0.400 | -0.009 | 0.004 | 3.25E-02 |
| rs11208844 | A | G | 0.139 | -0.011 | 0.006 | 8.76E-02 |
| rs6131805  | T | G | 0.401 | 0.006  | 0.004 | 1.65E-01 |
| rs1502249  | A | G | 0.524 | -0.002 | 0.004 | 6.60E-01 |
| rs295268   | T | C | 0.744 | -0.003 | 0.005 | 5.64E-01 |
| rs487722   | T | G | 0.210 | -0.005 | 0.005 | 3.10E-01 |
| rs4903203  | A | G | 0.323 | 0.007  | 0.005 | 1.40E-01 |
| rs2978382  | T | C | 0.590 | -0.008 | 0.004 | 5.94E-02 |

**eTable 4. Associations of morning diurnal preference genetic variants with midpoint of sleep.** The units of the beta coefficients are hours (i.e. not the standardized genetic associations). EA: effect allele; OA: other allele

| SNP        | EA | OA | EA Frequency | Beta   | Standard error | P value  |
|------------|----|----|--------------|--------|----------------|----------|
| rs10058356 | T  | C  | 0.699        | 0.005  | 0.003          | 3.21E-02 |
| rs10109566 | A  | G  | 0.491        | 0.003  | 0.003          | 1.09E-01 |
| rs1013987  | T  | C  | 0.407        | 0.004  | 0.003          | 8.27E-02 |
| rs10175975 | T  | C  | 0.182        | -0.004 | 0.003          | 1.03E-01 |
| rs10237162 | T  | C  | 0.725        | -0.004 | 0.003          | 1.03E-01 |
| rs10254050 | C  | G  | 0.187        | 0.011  | 0.003          | 2.34E-04 |
| rs1025601  | T  | C  | 0.385        | 0.001  | 0.003          | 2.98E-01 |
| rs10402849 | T  | C  | 0.201        | -0.005 | 0.003          | 4.63E-02 |
| rs10520176 | T  | C  | 0.504        | -0.001 | 0.003          | 2.94E-01 |
| rs1061032  | T  | G  | 0.090        | -0.015 | 0.004          | 2.73E-04 |
| rs1064213  | A  | G  | 0.473        | -0.005 | 0.003          | 2.82E-02 |
| rs10742179 | A  | G  | 0.259        | -0.004 | 0.003          | 9.78E-02 |
| rs10759208 | T  | C  | 0.610        | 0.003  | 0.003          | 1.40E-01 |
| rs10762434 | C  | G  | 0.778        | -0.007 | 0.003          | 1.35E-02 |
| rs10777221 | C  | T  | 0.396        | -0.006 | 0.003          | 9.52E-03 |
| rs10818834 | T  | C  | 0.734        | -0.004 | 0.003          | 6.70E-02 |
| rs10830107 | A  | G  | 0.797        | -0.001 | 0.003          | 3.49E-01 |
| rs10832648 | A  | C  | 0.196        | 0.006  | 0.003          | 2.59E-02 |
| rs10838687 | T  | G  | 0.791        | 0.001  | 0.003          | 3.89E-01 |
| rs10877962 | T  | C  | 0.416        | -0.004 | 0.003          | 6.17E-02 |
| rs10916892 | T  | C  | 0.623        | 0.003  | 0.003          | 1.63E-01 |
| rs10917513 | T  | C  | 0.654        | 0.004  | 0.003          | 8.46E-02 |
| rs10951325 | T  | C  | 0.634        | -0.003 | 0.003          | 1.13E-01 |
| rs10988239 | T  | C  | 0.511        | -0.001 | 0.003          | 2.80E-01 |
| rs11032362 | A  | G  | 0.091        | -0.011 | 0.004          | 5.90E-03 |
| rs11062167 | A  | G  | 0.537        | -0.005 | 0.003          | 2.40E-02 |

|             |   |   |       |        |       |          |
|-------------|---|---|-------|--------|-------|----------|
| rs11102807  | A | G | 0.538 | 0.002  | 0.003 | 2.40E-01 |
| rs111261826 | A | C | 0.680 | 0.000  | 0.003 | 4.41E-01 |
| rs11152350  | A | C | 0.472 | 0.005  | 0.003 | 2.51E-02 |
| rs11154718  | T | C | 0.427 | 0.004  | 0.003 | 8.20E-02 |
| rs11165655  | A | G | 0.524 | 0.001  | 0.003 | 3.41E-01 |
| rs11186842  | A | T | 0.724 | 0.006  | 0.003 | 1.84E-02 |
| rs11200159  | A | C | 0.656 | 0.004  | 0.003 | 8.10E-02 |
| rs11208844  | A | G | 0.138 | -0.003 | 0.004 | 2.40E-01 |
| rs113161209 | A | G | 0.070 | -0.016 | 0.005 | 7.23E-04 |
| rs113851554 | T | G | 0.057 | 0.022  | 0.006 | 5.78E-05 |
| rs1144566   | T | C | 0.030 | -0.026 | 0.007 | 2.04E-04 |
| rs114848860 | A | T | 0.976 | 0.008  | 0.008 | 1.76E-01 |
| rs115073088 | A | G | 0.976 | 0.015  | 0.008 | 3.68E-02 |
| rs11545787  | A | G | 0.250 | 0.002  | 0.003 | 2.59E-01 |
| rs11588913  | A | G | 0.399 | -0.001 | 0.003 | 2.88E-01 |
| rs11597421  | A | G | 0.501 | -0.002 | 0.003 | 1.96E-01 |
| rs11611435  | T | C | 0.550 | -0.004 | 0.003 | 6.47E-02 |
| rs1163238   | A | G | 0.394 | 0.008  | 0.003 | 1.38E-03 |
| rs1163628   | A | C | 0.857 | 0.004  | 0.004 | 1.10E-01 |
| rs11641239  | T | C | 0.288 | 0.001  | 0.003 | 3.24E-01 |
| rs11670534  | T | C | 0.165 | 0.006  | 0.003 | 4.04E-02 |
| rs11677484  | T | G | 0.255 | -0.001 | 0.003 | 4.25E-01 |
| rs11678584  | A | T | 0.860 | 0.006  | 0.004 | 5.15E-02 |
| rs11681299  | T | C | 0.288 | -0.007 | 0.003 | 7.80E-03 |
| rs11788633  | C | G | 0.651 | -0.005 | 0.003 | 2.95E-02 |
| rs118047999 | C | G | 0.249 | -0.004 | 0.003 | 8.43E-02 |
| rs11845599  | A | G | 0.635 | 0.002  | 0.003 | 1.80E-01 |
| rs12040629  | A | G | 0.161 | -0.009 | 0.003 | 5.99E-03 |
| rs12051     | A | G | 0.613 | 0.005  | 0.003 | 3.95E-02 |
| rs12065331  | T | C | 0.311 | 0.000  | 0.003 | 4.90E-01 |

|            |   |   |       |        |       |          |
|------------|---|---|-------|--------|-------|----------|
| rs12140153 | T | G | 0.098 | 0.008  | 0.004 | 2.97E-02 |
| rs12195792 | A | T | 0.270 | -0.006 | 0.003 | 1.36E-02 |
| rs12206814 | C | G | 0.492 | 0.000  | 0.003 | 4.97E-01 |
| rs1221502  | A | C | 0.738 | 0.001  | 0.003 | 3.58E-01 |
| rs12249410 | T | G | 0.110 | 0.001  | 0.004 | 4.24E-01 |
| rs12298405 | T | C | 0.329 | 0.002  | 0.003 | 2.48E-01 |
| rs12378543 | T | C | 0.386 | 0.005  | 0.003 | 2.02E-02 |
| rs12380242 | T | C | 0.502 | 0.003  | 0.002 | 1.07E-01 |
| rs12436039 | T | C | 0.881 | -0.010 | 0.004 | 6.52E-03 |
| rs12442008 | T | C | 0.253 | -0.001 | 0.003 | 3.35E-01 |
| rs12442674 | A | C | 0.725 | -0.004 | 0.003 | 6.42E-02 |
| rs12445235 | C | G | 0.409 | 0.001  | 0.003 | 3.10E-01 |
| rs12464387 | A | G | 0.459 | 0.003  | 0.003 | 9.28E-02 |
| rs12470914 | A | T | 0.102 | -0.008 | 0.004 | 3.20E-02 |
| rs12600452 | A | G | 0.206 | 0.000  | 0.003 | 4.51E-01 |
| rs12631477 | T | C | 0.798 | -0.002 | 0.003 | 2.80E-01 |
| rs12636669 | T | C | 0.083 | -0.004 | 0.005 | 2.15E-01 |
| rs12771973 | A | G | 0.254 | 0.001  | 0.003 | 3.92E-01 |
| rs1278402  | A | G | 0.733 | -0.003 | 0.003 | 1.68E-01 |
| rs12808544 | A | C | 0.240 | 0.003  | 0.003 | 1.47E-01 |
| rs12871550 | A | G | 0.319 | -0.002 | 0.003 | 1.88E-01 |
| rs12927162 | A | G | 0.723 | -0.014 | 0.003 | 1.01E-07 |
| rs12950382 | A | G | 0.724 | -0.005 | 0.003 | 4.26E-02 |
| rs12969848 | T | C | 0.532 | -0.008 | 0.003 | 9.68E-04 |
| rs13004345 | T | C | 0.656 | 0.005  | 0.003 | 2.20E-02 |
| rs13011556 | C | G | 0.759 | 0.001  | 0.003 | 3.08E-01 |
| rs13065394 | T | G | 0.287 | 0.005  | 0.003 | 4.69E-02 |
| rs13172141 | A | T | 0.570 | -0.006 | 0.003 | 7.47E-03 |
| rs13203140 | T | C | 0.640 | 0.001  | 0.003 | 3.82E-01 |
| rs13377754 | T | C | 0.610 | -0.007 | 0.003 | 3.50E-03 |

|             |   |   |       |        |       |          |
|-------------|---|---|-------|--------|-------|----------|
| rs13414393  | T | C | 0.540 | 0.004  | 0.003 | 5.18E-02 |
| rs1398346   | T | C | 0.871 | -0.004 | 0.004 | 1.70E-01 |
| rs139911    | T | C | 0.576 | 0.006  | 0.003 | 5.24E-03 |
| rs1421085   | T | C | 0.595 | 0.006  | 0.003 | 5.68E-03 |
| rs1449403   | A | G | 0.122 | -0.010 | 0.004 | 4.16E-03 |
| rs1468945   | A | G | 0.786 | 0.007  | 0.003 | 8.43E-03 |
| rs1474754   | A | G | 0.266 | -0.001 | 0.003 | 4.12E-01 |
| rs149611468 | T | C | 0.988 | -0.028 | 0.012 | 8.98E-03 |
| rs1502249   | A | G | 0.524 | -0.008 | 0.003 | 4.47E-04 |
| rs1508608   | A | G | 0.321 | -0.002 | 0.003 | 2.45E-01 |
| rs1559253   | A | G | 0.359 | -0.001 | 0.003 | 4.10E-01 |
| rs1599374   | A | G | 0.510 | -0.003 | 0.003 | 1.18E-01 |
| rs16939162  | A | G | 0.832 | -0.010 | 0.003 | 1.97E-03 |
| rs17007397  | C | G | 0.578 | -0.010 | 0.003 | 2.62E-05 |
| rs17140201  | A | G | 0.173 | 0.005  | 0.003 | 7.60E-02 |
| rs17302081  | T | C | 0.442 | -0.009 | 0.003 | 2.35E-04 |
| rs1737893   | T | C | 0.380 | 0.000  | 0.003 | 4.58E-01 |
| rs17396357  | T | C | 0.379 | -0.003 | 0.003 | 1.66E-01 |
| rs17448682  | T | C | 0.234 | -0.013 | 0.003 | 1.15E-05 |
| rs17455138  | T | C | 0.766 | -0.007 | 0.003 | 1.10E-02 |
| rs17575798  | A | G | 0.192 | 0.009  | 0.003 | 2.03E-03 |
| rs17577073  | A | C | 0.566 | -0.004 | 0.003 | 5.01E-02 |
| rs17604349  | A | G | 0.179 | 0.012  | 0.003 | 2.10E-04 |
| rs17712705  | A | G | 0.331 | -0.001 | 0.003 | 3.81E-01 |
| rs1788784   | A | G | 0.341 | -0.002 | 0.003 | 2.70E-01 |
| rs1799464   | A | G | 0.292 | -0.004 | 0.003 | 9.73E-02 |
| rs1800828   | C | G | 0.747 | -0.006 | 0.003 | 1.47E-02 |
| rs1811899   | T | C | 0.791 | 0.005  | 0.003 | 6.30E-02 |
| rs184033703 | A | G | 0.058 | -0.003 | 0.005 | 2.85E-01 |
| rs1843888   | A | G | 0.548 | -0.009 | 0.003 | 1.82E-04 |



|            |   |   |       |        |       |          |
|------------|---|---|-------|--------|-------|----------|
| rs187028   | A | T | 0.318 | 0.002  | 0.003 | 2.11E-01 |
| rs1871729  | A | G | 0.682 | 0.004  | 0.003 | 9.02E-02 |
| rs1873958  | A | G | 0.408 | -0.003 | 0.003 | 1.52E-01 |
| rs1886205  | A | C | 0.759 | -0.003 | 0.003 | 1.83E-01 |
| rs1931814  | A | G | 0.478 | -0.002 | 0.002 | 1.97E-01 |
| rs2011528  | T | C | 0.830 | 0.000  | 0.003 | 4.82E-01 |
| rs2050185  | A | G | 0.630 | -0.007 | 0.003 | 4.17E-03 |
| rs2072727  | T | C | 0.436 | -0.005 | 0.003 | 2.34E-02 |
| rs2166559  | T | C | 0.860 | 0.003  | 0.004 | 1.79E-01 |
| rs2298117  | T | C | 0.448 | 0.007  | 0.003 | 4.06E-03 |
| rs2304467  | C | G | 0.600 | 0.002  | 0.003 | 2.03E-01 |
| rs2322605  | A | G | 0.478 | 0.005  | 0.002 | 1.46E-02 |
| rs2362775  | T | C | 0.527 | 0.010  | 0.003 | 3.12E-05 |
| rs2396004  | A | G | 0.434 | -0.001 | 0.003 | 3.95E-01 |
| rs2433634  | A | C | 0.718 | 0.003  | 0.003 | 1.66E-01 |
| rs247929   | C | G | 0.505 | 0.000  | 0.002 | 4.83E-01 |
| rs2514214  | A | G | 0.266 | -0.003 | 0.003 | 1.78E-01 |
| rs2550298  | T | C | 0.377 | 0.003  | 0.003 | 1.27E-01 |
| rs2580160  | A | G | 0.552 | 0.000  | 0.003 | 4.27E-01 |
| rs2593487  | A | G | 0.342 | 0.006  | 0.003 | 1.07E-02 |
| rs2648721  | T | G | 0.702 | 0.008  | 0.003 | 2.89E-03 |
| rs2653349  | A | G | 0.213 | -0.011 | 0.003 | 1.49E-04 |
| rs2706762  | T | C | 0.150 | 0.003  | 0.003 | 1.63E-01 |
| rs2737245  | T | G | 0.280 | -0.005 | 0.003 | 3.17E-02 |
| rs28380327 | A | T | 0.627 | -0.005 | 0.003 | 1.91E-02 |
| rs2844016  | T | C | 0.299 | -0.001 | 0.003 | 3.33E-01 |
| rs28459838 | T | C | 0.234 | -0.001 | 0.003 | 3.72E-01 |
| rs2850979  | T | C | 0.759 | -0.001 | 0.003 | 4.18E-01 |
| rs2878172  | A | G | 0.568 | 0.004  | 0.003 | 7.51E-02 |
| rs2881955  | T | C | 0.279 | -0.006 | 0.003 | 1.15E-02 |

|            |   |   |       |        |       |          |
|------------|---|---|-------|--------|-------|----------|
| rs2901796  | A | G | 0.397 | -0.005 | 0.003 | 1.64E-02 |
| rs2916148  | A | G | 0.456 | -0.001 | 0.003 | 2.98E-01 |
| rs2944831  | A | G | 0.298 | -0.011 | 0.003 | 2.63E-05 |
| rs295268   | T | C | 0.743 | 0.010  | 0.003 | 2.65E-04 |
| rs2978382  | T | C | 0.590 | -0.003 | 0.003 | 8.55E-02 |
| rs2979139  | A | G | 0.505 | 0.008  | 0.002 | 1.28E-03 |
| rs301218   | A | G | 0.390 | 0.002  | 0.003 | 2.17E-01 |
| rs308521   | T | C | 0.602 | -0.002 | 0.003 | 2.57E-01 |
| rs3100052  | A | G | 0.389 | -0.006 | 0.003 | 1.04E-02 |
| rs3138490  | A | T | 0.515 | -0.009 | 0.003 | 3.76E-04 |
| rs34054660 | A | G | 0.575 | 0.000  | 0.003 | 4.71E-01 |
| rs34329963 | T | C | 0.113 | 0.003  | 0.004 | 2.41E-01 |
| rs34509802 | A | G | 0.178 | -0.006 | 0.003 | 3.32E-02 |
| rs34967119 | A | G | 0.500 | -0.003 | 0.002 | 9.57E-02 |
| rs35346733 | A | G | 0.193 | 0.001  | 0.003 | 4.07E-01 |
| rs35524253 | A | G | 0.357 | -0.002 | 0.003 | 2.60E-01 |
| rs35588117 | A | G | 0.105 | 0.004  | 0.004 | 1.54E-01 |
| rs359248   | T | G | 0.449 | 0.003  | 0.003 | 1.24E-01 |
| rs3743794  | A | G | 0.607 | -0.004 | 0.003 | 4.66E-02 |
| rs3760381  | A | G | 0.251 | -0.008 | 0.003 | 4.17E-03 |
| rs3796618  | A | T | 0.533 | -0.001 | 0.003 | 3.17E-01 |
| rs3807651  | A | T | 0.492 | -0.004 | 0.003 | 6.53E-02 |
| rs3808964  | T | G | 0.631 | -0.004 | 0.003 | 6.79E-02 |
| rs3815983  | T | C | 0.359 | 0.007  | 0.003 | 6.03E-03 |
| rs3850174  | A | T | 0.258 | 0.004  | 0.003 | 1.04E-01 |
| rs3857599  | A | C | 0.162 | -0.005 | 0.003 | 7.89E-02 |
| rs3867239  | A | G | 0.380 | -0.002 | 0.003 | 2.49E-01 |
| rs3923809  | A | G | 0.698 | 0.004  | 0.003 | 5.85E-02 |
| rs3955311  | T | C | 0.153 | -0.002 | 0.003 | 3.02E-01 |
| rs4027217  | A | C | 0.212 | 0.006  | 0.003 | 3.21E-02 |

|            |   |   |       |        |       |          |
|------------|---|---|-------|--------|-------|----------|
| rs412000   | C | G | 0.560 | 0.003  | 0.003 | 1.31E-01 |
| rs4121878  | C | G | 0.508 | -0.004 | 0.002 | 7.35E-02 |
| rs42210    | C | G | 0.709 | 0.006  | 0.003 | 1.73E-02 |
| rs4236237  | A | C | 0.598 | 0.009  | 0.003 | 3.34E-04 |
| rs4241964  | T | G | 0.528 | 0.000  | 0.003 | 4.68E-01 |
| rs4269995  | T | C | 0.251 | 0.008  | 0.003 | 3.00E-03 |
| rs4365329  | A | T | 0.542 | 0.005  | 0.003 | 2.76E-02 |
| rs4419127  | A | G | 0.665 | -0.006 | 0.003 | 1.37E-02 |
| rs4535583  | T | C | 0.697 | -0.003 | 0.003 | 1.20E-01 |
| rs4550384  | T | G | 0.754 | -0.004 | 0.003 | 9.96E-02 |
| rs4550782  | T | G | 0.670 | -0.003 | 0.003 | 1.34E-01 |
| rs45597035 | A | G | 0.652 | 0.001  | 0.003 | 2.94E-01 |
| rs465670   | T | C | 0.542 | -0.006 | 0.003 | 8.10E-03 |
| rs4657983  | A | G | 0.653 | 0.004  | 0.003 | 7.45E-02 |
| rs4666682  | A | G | 0.177 | 0.000  | 0.003 | 4.79E-01 |
| rs4672458  | T | C | 0.472 | 0.003  | 0.003 | 1.15E-01 |
| rs4690085  | A | G | 0.532 | -0.001 | 0.002 | 3.63E-01 |
| rs4698678  | C | G | 0.279 | -0.008 | 0.003 | 2.14E-03 |
| rs4729854  | A | T | 0.484 | 0.009  | 0.003 | 1.14E-04 |
| rs4761989  | T | C | 0.867 | 0.003  | 0.004 | 2.17E-01 |
| rs4775086  | A | G | 0.241 | 0.006  | 0.003 | 2.88E-02 |
| rs4785296  | C | G | 0.234 | -0.006 | 0.003 | 2.92E-02 |
| rs4800998  | A | T | 0.184 | -0.008 | 0.003 | 9.52E-03 |
| rs4804951  | A | G | 0.329 | -0.005 | 0.003 | 2.45E-02 |
| rs481214   | A | T | 0.603 | -0.003 | 0.003 | 9.93E-02 |
| rs4860734  | A | G | 0.283 | -0.002 | 0.003 | 2.24E-01 |
| rs487722   | T | G | 0.212 | -0.005 | 0.003 | 4.89E-02 |
| rs4878734  | A | T | 0.516 | -0.007 | 0.002 | 3.01E-03 |
| rs4903203  | A | G | 0.323 | -0.006 | 0.003 | 1.04E-02 |
| rs4923541  | T | C | 0.508 | 0.001  | 0.002 | 3.16E-01 |

|            |   |   |       |        |       |          |
|------------|---|---|-------|--------|-------|----------|
| rs4936290  | A | C | 0.651 | 0.004  | 0.003 | 4.68E-02 |
| rs495593   | A | G | 0.742 | -0.005 | 0.003 | 3.48E-02 |
| rs497338   | T | C | 0.281 | -0.005 | 0.003 | 2.66E-02 |
| rs5016898  | T | C | 0.425 | 0.006  | 0.003 | 9.36E-03 |
| rs555784   | A | T | 0.385 | 0.005  | 0.003 | 2.82E-02 |
| rs55846845 | A | G | 0.521 | 0.007  | 0.003 | 4.41E-03 |
| rs56113850 | T | C | 0.421 | 0.004  | 0.003 | 4.59E-02 |
| rs57236847 | C | G | 0.603 | -0.006 | 0.003 | 8.96E-03 |
| rs58681483 | A | G | 0.921 | -0.006 | 0.005 | 1.11E-01 |
| rs58876439 | A | G | 0.070 | -0.010 | 0.005 | 2.01E-02 |
| rs59986227 | C | G | 0.743 | 0.004  | 0.003 | 6.51E-02 |
| rs6007594  | A | G | 0.260 | 0.005  | 0.003 | 3.62E-02 |
| rs6047481  | A | T | 0.673 | 0.002  | 0.003 | 2.45E-01 |
| rs605203   | A | C | 0.636 | 0.003  | 0.003 | 1.20E-01 |
| rs60616179 | A | G | 0.944 | -0.013 | 0.005 | 9.78E-03 |
| rs6131805  | T | G | 0.402 | -0.003 | 0.003 | 1.16E-01 |
| rs6131942  | A | G | 0.420 | 0.004  | 0.003 | 4.80E-02 |
| rs61773390 | T | G | 0.197 | -0.013 | 0.003 | 1.34E-05 |
| rs61990287 | A | C | 0.284 | -0.004 | 0.003 | 5.78E-02 |
| rs62082402 | T | G | 0.191 | -0.005 | 0.003 | 5.43E-02 |
| rs62124718 | A | G | 0.895 | 0.009  | 0.004 | 1.02E-02 |
| rs621421   | T | C | 0.623 | 0.009  | 0.003 | 4.83E-04 |
| rs62182135 | A | C | 0.332 | 0.003  | 0.003 | 1.18E-01 |
| rs62465218 | A | C | 0.149 | 0.007  | 0.004 | 1.77E-02 |
| rs62479736 | T | G | 0.294 | -0.004 | 0.003 | 7.35E-02 |
| rs62553781 | T | C | 0.035 | 0.005  | 0.007 | 2.26E-01 |
| rs6429233  | A | G | 0.453 | -0.005 | 0.003 | 3.27E-02 |
| rs6433478  | T | C | 0.457 | 0.002  | 0.003 | 2.12E-01 |
| rs6440833  | A | G | 0.461 | -0.002 | 0.003 | 2.14E-01 |
| rs6468316  | T | C | 0.477 | 0.004  | 0.002 | 5.12E-02 |

|            |   |   |       |        |       |          |
|------------|---|---|-------|--------|-------|----------|
| rs6477309  | T | C | 0.664 | 0.000  | 0.003 | 4.56E-01 |
| rs6544906  | A | C | 0.564 | -0.004 | 0.003 | 4.47E-02 |
| rs6560218  | T | C | 0.518 | 0.002  | 0.003 | 2.30E-01 |
| rs6573308  | T | C | 0.391 | -0.001 | 0.003 | 3.99E-01 |
| rs662094   | A | G | 0.497 | -0.005 | 0.003 | 2.81E-02 |
| rs66507804 | T | C | 0.795 | 0.006  | 0.003 | 2.05E-02 |
| rs66617308 | T | C | 0.673 | -0.002 | 0.003 | 1.84E-01 |
| rs6665637  | A | G | 0.282 | 0.002  | 0.003 | 2.10E-01 |
| rs6690292  | T | C | 0.728 | 0.000  | 0.003 | 4.93E-01 |
| rs6718511  | A | G | 0.552 | -0.005 | 0.003 | 1.82E-02 |
| rs6727752  | A | G | 0.373 | -0.005 | 0.003 | 3.86E-02 |
| rs6794796  | A | G | 0.288 | -0.004 | 0.003 | 5.76E-02 |
| rs67988891 | C | G | 0.679 | 0.007  | 0.003 | 5.32E-03 |
| rs6816922  | A | C | 0.537 | 0.001  | 0.003 | 3.77E-01 |
| rs6838677  | A | C | 0.669 | 0.007  | 0.003 | 5.66E-03 |
| rs6846730  | T | C | 0.232 | 0.009  | 0.003 | 9.51E-04 |
| rs695459   | T | C | 0.388 | 0.002  | 0.003 | 1.71E-01 |
| rs6958557  | T | G | 0.604 | -0.003 | 0.003 | 1.39E-01 |
| rs6961970  | A | C | 0.247 | -0.004 | 0.003 | 1.11E-01 |
| rs6967481  | T | C | 0.497 | -0.008 | 0.003 | 1.40E-03 |
| rs6968240  | A | C | 0.432 | -0.001 | 0.003 | 3.36E-01 |
| rs6988733  | T | C | 0.345 | -0.004 | 0.003 | 8.50E-02 |
| rs6993892  | T | C | 0.609 | 0.004  | 0.003 | 4.05E-02 |
| rs7006885  | A | G | 0.289 | -0.007 | 0.003 | 3.77E-03 |
| rs710284   | T | C | 0.586 | -0.007 | 0.003 | 1.99E-03 |
| rs711098   | A | C | 0.403 | 0.002  | 0.003 | 2.71E-01 |
| rs7111582  | A | G | 0.896 | 0.003  | 0.004 | 2.04E-01 |
| rs7143933  | T | G | 0.264 | -0.002 | 0.003 | 1.94E-01 |
| rs71523448 | C | G | 0.079 | 0.006  | 0.005 | 9.21E-02 |
| rs7203707  | A | C | 0.517 | 0.009  | 0.003 | 1.57E-04 |

|            |   |   |       |        |       |          |
|------------|---|---|-------|--------|-------|----------|
| rs7248205  | T | C | 0.604 | 0.000  | 0.003 | 4.28E-01 |
| rs72720396 | A | G | 0.767 | 0.009  | 0.003 | 8.43E-04 |
| rs72729847 | T | C | 0.802 | 0.006  | 0.003 | 2.16E-02 |
| rs72773411 | A | G | 0.158 | -0.007 | 0.003 | 2.49E-02 |
| rs72790386 | T | G | 0.033 | -0.003 | 0.007 | 3.24E-01 |
| rs72796401 | A | T | 0.187 | -0.001 | 0.003 | 4.28E-01 |
| rs72829706 | A | G | 0.961 | -0.011 | 0.006 | 4.73E-02 |
| rs72841368 | A | T | 0.812 | 0.007  | 0.003 | 1.70E-02 |
| rs72950188 | T | C | 0.925 | -0.011 | 0.005 | 1.02E-02 |
| rs72966564 | T | C | 0.250 | 0.001  | 0.003 | 4.19E-01 |
| rs7298532  | T | C | 0.718 | 0.004  | 0.003 | 8.78E-02 |
| rs7299922  | A | G | 0.629 | -0.005 | 0.003 | 1.92E-02 |
| rs73026775 | A | G | 0.129 | -0.001 | 0.004 | 4.04E-01 |
| rs7304278  | A | G | 0.275 | 0.006  | 0.003 | 2.13E-02 |
| rs73050286 | T | C | 0.785 | -0.007 | 0.003 | 8.89E-03 |
| rs7429614  | T | G | 0.419 | -0.006 | 0.003 | 1.39E-02 |
| rs74357745 | A | G | 0.880 | 0.002  | 0.004 | 2.91E-01 |
| rs747003   | T | C | 0.608 | -0.004 | 0.003 | 7.33E-02 |
| rs75120545 | T | C | 0.030 | -0.018 | 0.008 | 8.97E-03 |
| rs7602499  | T | C | 0.345 | -0.006 | 0.003 | 7.60E-03 |
| rs76064513 | T | C | 0.130 | -0.005 | 0.004 | 8.09E-02 |
| rs7626335  | A | C | 0.331 | -0.001 | 0.003 | 3.48E-01 |
| rs7649164  | T | G | 0.581 | -0.002 | 0.003 | 2.60E-01 |
| rs76518095 | T | C | 0.078 | -0.017 | 0.005 | 1.81E-04 |
| rs766406   | T | G | 0.639 | 0.004  | 0.003 | 8.45E-02 |
| rs7700110  | A | G | 0.256 | -0.003 | 0.003 | 1.25E-01 |
| rs7701529  | A | T | 0.240 | 0.006  | 0.003 | 1.46E-02 |
| rs7721608  | T | G | 0.462 | -0.005 | 0.003 | 1.52E-02 |
| rs77960    | A | G | 0.328 | -0.004 | 0.003 | 9.21E-02 |
| rs7845620  | A | C | 0.834 | 0.008  | 0.003 | 9.49E-03 |

|            |   |   |       |        |       |          |
|------------|---|---|-------|--------|-------|----------|
| rs7900191  | T | C | 0.395 | 0.001  | 0.003 | 3.15E-01 |
| rs7943634  | T | C | 0.309 | 0.005  | 0.003 | 3.19E-02 |
| rs7975791  | T | C | 0.040 | -0.009 | 0.006 | 7.05E-02 |
| rs80097534 | T | G | 0.099 | 0.005  | 0.004 | 1.11E-01 |
| rs80271258 | T | C | 0.087 | 0.019  | 0.004 | 9.00E-06 |
| rs8044054  | T | C | 0.391 | -0.003 | 0.003 | 1.29E-01 |
| rs8072058  | A | T | 0.780 | 0.006  | 0.003 | 1.74E-02 |
| rs812925   | C | G | 0.646 | 0.002  | 0.003 | 1.78E-01 |
| rs848552   | C | G | 0.474 | 0.007  | 0.002 | 2.28E-03 |
| rs909757   | T | C | 0.632 | 0.000  | 0.003 | 4.40E-01 |
| rs9347926  | A | T | 0.447 | -0.003 | 0.003 | 8.32E-02 |
| rs9348050  | T | C | 0.490 | -0.001 | 0.003 | 3.72E-01 |
| rs9381812  | A | G | 0.704 | 0.009  | 0.003 | 3.21E-04 |
| rs938836   | A | G | 0.466 | 0.000  | 0.003 | 4.97E-01 |
| rs9394154  | C | G | 0.434 | 0.003  | 0.003 | 9.54E-02 |
| rs9416744  | A | C | 0.255 | -0.003 | 0.003 | 1.11E-01 |
| rs9436119  | A | G | 0.394 | -0.006 | 0.003 | 1.14E-02 |
| rs9465253  | T | C | 0.281 | -0.002 | 0.003 | 2.88E-01 |
| rs9476310  | T | C | 0.510 | -0.003 | 0.002 | 9.82E-02 |
| rs9479402  | T | C | 0.989 | 0.019  | 0.012 | 5.94E-02 |
| rs9496643  | A | G | 0.288 | -0.002 | 0.003 | 2.57E-01 |
| rs9558942  | T | C | 0.671 | 0.003  | 0.003 | 1.64E-01 |
| rs9571526  | T | G | 0.769 | 0.005  | 0.003 | 3.57E-02 |
| rs9573980  | A | G | 0.967 | -0.015 | 0.007 | 1.67E-02 |
| rs9597241  | A | C | 0.812 | -0.006 | 0.003 | 2.39E-02 |
| rs9611597  | A | T | 0.838 | -0.005 | 0.003 | 7.17E-02 |
| rs962961   | T | C | 0.329 | 0.007  | 0.003 | 3.71E-03 |
| rs9636202  | A | G | 0.268 | 0.003  | 0.003 | 1.45E-01 |
| rs9664044  | T | C | 0.231 | 0.003  | 0.003 | 1.42E-01 |
| rs975025   | T | C | 0.078 | 0.006  | 0.005 | 9.04E-02 |

|           |   |   |       |       |       |          |
|-----------|---|---|-------|-------|-------|----------|
| rs9817910 | A | G | 0.560 | 0.004 | 0.003 | 6.86E-02 |
| rs9836621 | T | C | 0.518 | 0.005 | 0.003 | 3.53E-02 |
| rs9950528 | A | G | 0.649 | 0.004 | 0.003 | 8.82E-02 |
| rs9956387 | A | T | 0.493 | 0.000 | 0.003 | 5.00E-01 |
| rs9964420 | A | C | 0.304 | 0.013 | 0.003 | 9.69E-07 |
| rs9997394 | A | G | 0.292 | 0.006 | 0.003 | 1.91E-02 |



**eTable 5. Variants identified as outliers by MR-PRESSO and RadialMR.**

| <b>Variants filtered by RadialMR</b> | <b>Variants filtered by MR-PRESSO</b> |
|--------------------------------------|---------------------------------------|
| rs10109566                           | rs10109566                            |
| rs1025601                            | rs11165655                            |
| rs10742179                           | rs139911                              |
| rs10759208                           | rs2050185                             |
| rs10818834                           | rs308521                              |
| rs10916892                           | rs61990287                            |
| rs10951325                           | rs662094                              |
| rs11102807                           | rs695459                              |
| rs111261826                          | rs77960                               |
| rs11152350                           | rs8044054                             |
| rs11165655                           | rs10109566                            |
| rs11588913                           | rs11165655                            |
| rs11677484                           |                                       |
| rs1221502                            |                                       |
| rs12442674                           |                                       |
| rs12464387                           |                                       |
| rs12600452                           |                                       |
| rs12636669                           |                                       |
| rs12871550                           |                                       |
| rs13377754                           |                                       |
| rs139911                             |                                       |
| rs1421085                            |                                       |
| rs16939162                           |                                       |
| rs17007397                           |                                       |
| rs1737893                            |                                       |
| rs17604349                           |                                       |
| rs17712705                           |                                       |

|            |  |
|------------|--|
| rs1800828  |  |
| rs1811899  |  |
| rs1843888  |  |
| rs1886205  |  |
| rs2050185  |  |
| rs2166559  |  |
| rs2362775  |  |
| rs2433634  |  |
| rs2550298  |  |
| rs2593487  |  |
| rs28380327 |  |
| rs2979139  |  |
| rs308521   |  |
| rs34054660 |  |
| rs359248   |  |
| rs3808964  |  |
| rs3867239  |  |
| rs3955311  |  |
| rs4269995  |  |
| rs4690085  |  |
| rs4800998  |  |
| rs4860734  |  |
| rs4923541  |  |
| rs6047481  |  |
| rs605203   |  |
| rs6131942  |  |
| rs61990287 |  |
| rs6440833  |  |
| rs6477309  |  |
| rs662094   |  |

|            |  |
|------------|--|
| rs6718511  |  |
| rs6816922  |  |
| rs695459   |  |
| rs6961970  |  |
| rs71523448 |  |
| rs74357745 |  |
| rs766406   |  |
| rs7700110  |  |
| rs77960    |  |
| rs7943634  |  |
| rs8044054  |  |
| rs9347926  |  |
| rs9571526  |  |
| rs9597241  |  |
| rs962961   |  |
| rs9636202  |  |
| rs9950528  |  |

**eTable 6. Random-effects inverse-variance weighted MR estimates for the effect of genetically proxied morning diurnal preference on depression (PGC-UKB) after progressive filtering of variants associated with other sleep phenotypes (sleep duration, short sleep duration, long sleep duration, daytime sleepiness, insomnia symptoms).**

| <b><i>P</i> threshold for association with other sleep phenotypes</b> | <b>Number of variants remaining after filtering</b> | <b>Mean F statistic</b> | <b>Odds ratio [95% CI]</b> | <b><i>P</i> value</b> |
|-----------------------------------------------------------------------|-----------------------------------------------------|-------------------------|----------------------------|-----------------------|
| 5.00E-08                                                              | 322                                                 | 25.2                    | 0.73 [0.60-0.89]           | 0.002                 |
| 5.00E-05                                                              | 301                                                 | 24.4                    | 0.75 [0.61-0.92]           | 0.006                 |
| 5.00E-03                                                              | 207                                                 | 22.5                    | 0.77 [0.59-1.00]           | 0.05                  |

**eTable 7.** Leave-one-out MR estimates for the effect of genetically proxied morning diurnal preference on major depressive disorder (using the PGC-UKB dataset). The *SNP* column lists the SNP that was removed in each respective analysis.

| <b>SNP</b> | <b>MR estimate</b>   | <b>P value</b> |
|------------|----------------------|----------------|
| rs10058356 | 0.766 [0.626, 0.939] | 0.01           |
| rs10109566 | 0.774 [0.633, 0.946] | 0.012          |
| rs1013987  | 0.766 [0.625, 0.938] | 0.01           |
| rs10175975 | 0.765 [0.624, 0.936] | 0.009          |
| rs10237162 | 0.762 [0.621, 0.933] | 0.009          |
| rs10254050 | 0.762 [0.622, 0.935] | 0.009          |
| rs1025601  | 0.763 [0.623, 0.934] | 0.009          |
| rs10402849 | 0.765 [0.625, 0.937] | 0.01           |
| rs10520176 | 0.768 [0.626, 0.94]  | 0.011          |
| rs1061032  | 0.771 [0.629, 0.944] | 0.012          |
| rs1064213  | 0.769 [0.627, 0.943] | 0.011          |
| rs10742179 | 0.756 [0.618, 0.925] | 0.007          |
| rs10759208 | 0.771 [0.629, 0.943] | 0.012          |
| rs10762434 | 0.766 [0.625, 0.939] | 0.01           |
| rs10777221 | 0.765 [0.625, 0.938] | 0.01           |
| rs10818834 | 0.772 [0.631, 0.945] | 0.012          |
| rs10830107 | 0.767 [0.626, 0.939] | 0.01           |
| rs10832648 | 0.764 [0.624, 0.936] | 0.009          |
| rs10838687 | 0.764 [0.623, 0.936] | 0.009          |
| rs10877962 | 0.77 [0.628, 0.944]  | 0.012          |
| rs10916892 | 0.775 [0.633, 0.949] | 0.013          |
| rs10917513 | 0.76 [0.621, 0.931]  | 0.008          |
| rs10951325 | 0.772 [0.631, 0.946] | 0.012          |
| rs10988239 | 0.765 [0.625, 0.937] | 0.01           |
| rs11032362 | 0.763 [0.622, 0.935] | 0.009          |
| rs11062167 | 0.766 [0.625, 0.939] | 0.01           |
| rs11102807 | 0.762 [0.623, 0.933] | 0.009          |

|             |                      |       |
|-------------|----------------------|-------|
| rs111261826 | 0.771 [0.63, 0.945]  | 0.012 |
| rs11152350  | 0.76 [0.621, 0.93]   | 0.008 |
| rs11154718  | 0.765 [0.625, 0.938] | 0.01  |
| rs11165655  | 0.777 [0.635, 0.949] | 0.014 |
| rs11186842  | 0.763 [0.623, 0.935] | 0.009 |
| rs11200159  | 0.765 [0.625, 0.938] | 0.01  |
| rs11208844  | 0.762 [0.623, 0.933] | 0.009 |
| rs113161209 | 0.767 [0.626, 0.94]  | 0.01  |
| rs113851554 | 0.765 [0.625, 0.937] | 0.01  |
| rs1144566   | 0.754 [0.613, 0.927] | 0.007 |
| rs114848860 | 0.766 [0.625, 0.939] | 0.01  |
| rs115073088 | 0.767 [0.627, 0.94]  | 0.011 |
| rs11545787  | 0.773 [0.631, 0.948] | 0.013 |
| rs11588913  | 0.762 [0.622, 0.933] | 0.008 |
| rs11597421  | 0.77 [0.629, 0.943]  | 0.011 |
| rs11611435  | 0.764 [0.624, 0.936] | 0.009 |
| rs1163238   | 0.768 [0.627, 0.94]  | 0.011 |
| rs1163628   | 0.763 [0.623, 0.935] | 0.009 |
| rs11641239  | 0.766 [0.625, 0.938] | 0.01  |
| rs11670534  | 0.765 [0.624, 0.937] | 0.01  |
| rs11677484  | 0.769 [0.629, 0.942] | 0.011 |
| rs11678584  | 0.764 [0.624, 0.936] | 0.009 |
| rs11681299  | 0.77 [0.628, 0.943]  | 0.011 |
| rs11788633  | 0.761 [0.622, 0.932] | 0.008 |
| rs118047999 | 0.77 [0.628, 0.943]  | 0.011 |
| rs11845599  | 0.765 [0.624, 0.937] | 0.01  |
| rs12040629  | 0.761 [0.62, 0.933]  | 0.009 |
| rs12051     | 0.768 [0.627, 0.941] | 0.011 |
| rs12065331  | 0.767 [0.626, 0.94]  | 0.011 |
| rs12140153  | 0.765 [0.624, 0.937] | 0.01  |

|            |                      |       |
|------------|----------------------|-------|
| rs12195792 | 0.768 [0.627, 0.941] | 0.011 |
| rs12206814 | 0.766 [0.625, 0.938] | 0.01  |
| rs1221502  | 0.762 [0.622, 0.932] | 0.008 |
| rs12249410 | 0.768 [0.627, 0.941] | 0.011 |
| rs12298405 | 0.768 [0.627, 0.941] | 0.011 |
| rs12378543 | 0.767 [0.626, 0.939] | 0.01  |
| rs12380242 | 0.767 [0.626, 0.939] | 0.01  |
| rs12436039 | 0.764 [0.624, 0.936] | 0.009 |
| rs12442008 | 0.768 [0.627, 0.941] | 0.011 |
| rs12442674 | 0.773 [0.631, 0.946] | 0.013 |
| rs12445235 | 0.766 [0.625, 0.938] | 0.01  |
| rs12464387 | 0.771 [0.63, 0.944]  | 0.012 |
| rs12470914 | 0.763 [0.623, 0.935] | 0.009 |
| rs12600452 | 0.761 [0.621, 0.932] | 0.008 |
| rs12631477 | 0.767 [0.626, 0.939] | 0.01  |
| rs12636669 | 0.759 [0.62, 0.929]  | 0.008 |
| rs12771973 | 0.762 [0.623, 0.934] | 0.009 |
| rs1278402  | 0.766 [0.625, 0.939] | 0.01  |
| rs12808544 | 0.768 [0.627, 0.941] | 0.011 |
| rs12871550 | 0.759 [0.62, 0.928]  | 0.007 |
| rs12927162 | 0.766 [0.625, 0.939] | 0.01  |
| rs12950382 | 0.765 [0.625, 0.938] | 0.01  |
| rs12969848 | 0.77 [0.629, 0.943]  | 0.012 |
| rs13004345 | 0.764 [0.623, 0.935] | 0.009 |
| rs13011556 | 0.767 [0.626, 0.939] | 0.01  |
| rs13065394 | 0.767 [0.626, 0.939] | 0.01  |
| rs13172141 | 0.767 [0.626, 0.939] | 0.01  |
| rs13203140 | 0.766 [0.625, 0.939] | 0.01  |
| rs13377754 | 0.777 [0.634, 0.952] | 0.015 |
| rs13414393 | 0.765 [0.624, 0.937] | 0.01  |

|             |                      |       |
|-------------|----------------------|-------|
| rs1398346   | 0.766 [0.625, 0.938] | 0.01  |
| rs139911    | 0.774 [0.633, 0.947] | 0.013 |
| rs1421085   | 0.756 [0.617, 0.926] | 0.007 |
| rs1449403   | 0.769 [0.627, 0.942] | 0.011 |
| rs1468945   | 0.764 [0.624, 0.936] | 0.009 |
| rs1474754   | 0.765 [0.624, 0.937] | 0.01  |
| rs149611468 | 0.76 [0.621, 0.932]  | 0.008 |
| rs1502249   | 0.766 [0.626, 0.939] | 0.01  |
| rs1508608   | 0.761 [0.621, 0.932] | 0.008 |
| rs1559253   | 0.768 [0.627, 0.941] | 0.011 |
| rs1599374   | 0.765 [0.625, 0.938] | 0.01  |
| rs16939162  | 0.77 [0.629, 0.943]  | 0.012 |
| rs17007397  | 0.761 [0.622, 0.932] | 0.008 |
| rs17140201  | 0.767 [0.626, 0.939] | 0.01  |
| rs17302081  | 0.765 [0.624, 0.937] | 0.009 |
| rs1737893   | 0.772 [0.63, 0.945]  | 0.012 |
| rs17396357  | 0.765 [0.624, 0.937] | 0.01  |
| rs17448682  | 0.764 [0.624, 0.936] | 0.009 |
| rs17455138  | 0.764 [0.623, 0.936] | 0.009 |
| rs17575798  | 0.765 [0.624, 0.937] | 0.01  |
| rs17577073  | 0.762 [0.622, 0.933] | 0.009 |
| rs17604349  | 0.772 [0.63, 0.945]  | 0.012 |
| rs17712705  | 0.774 [0.632, 0.947] | 0.013 |
| rs1788784   | 0.761 [0.621, 0.932] | 0.008 |
| rs1799464   | 0.766 [0.625, 0.938] | 0.01  |
| rs1800828   | 0.763 [0.624, 0.934] | 0.009 |
| rs1811899   | 0.758 [0.619, 0.927] | 0.007 |
| rs184033703 | 0.765 [0.625, 0.937] | 0.01  |
| rs1843888   | 0.777 [0.634, 0.952] | 0.015 |
| rs187028    | 0.765 [0.624, 0.937] | 0.01  |



|            |                      |       |
|------------|----------------------|-------|
| rs1871729  | 0.764 [0.624, 0.936] | 0.009 |
| rs1873958  | 0.762 [0.622, 0.934] | 0.009 |
| rs1886205  | 0.774 [0.633, 0.947] | 0.013 |
| rs1931814  | 0.769 [0.628, 0.942] | 0.011 |
| rs2011528  | 0.766 [0.625, 0.938] | 0.01  |
| rs2050185  | 0.772 [0.632, 0.944] | 0.012 |
| rs2072727  | 0.765 [0.624, 0.937] | 0.01  |
| rs2166559  | 0.762 [0.623, 0.933] | 0.008 |
| rs2298117  | 0.765 [0.625, 0.937] | 0.01  |
| rs2304467  | 0.765 [0.624, 0.937] | 0.01  |
| rs2322605  | 0.766 [0.625, 0.938] | 0.01  |
| rs2362775  | 0.764 [0.624, 0.936] | 0.009 |
| rs2396004  | 0.764 [0.624, 0.936] | 0.009 |
| rs2433634  | 0.76 [0.621, 0.931]  | 0.008 |
| rs247929   | 0.761 [0.622, 0.933] | 0.008 |
| rs2514214  | 0.764 [0.623, 0.935] | 0.009 |
| rs2550298  | 0.775 [0.632, 0.949] | 0.013 |
| rs2580160  | 0.767 [0.626, 0.939] | 0.01  |
| rs2593487  | 0.772 [0.63, 0.945]  | 0.012 |
| rs2648721  | 0.765 [0.625, 0.937] | 0.01  |
| rs2653349  | 0.768 [0.626, 0.942] | 0.011 |
| rs2706762  | 0.762 [0.622, 0.933] | 0.009 |
| rs2737245  | 0.767 [0.626, 0.939] | 0.01  |
| rs28380327 | 0.752 [0.614, 0.92]  | 0.006 |
| rs2844016  | 0.767 [0.626, 0.94]  | 0.011 |
| rs28459838 | 0.769 [0.628, 0.942] | 0.011 |
| rs2850979  | 0.766 [0.625, 0.938] | 0.01  |
| rs2878172  | 0.764 [0.624, 0.936] | 0.009 |
| rs2881955  | 0.767 [0.626, 0.939] | 0.01  |
| rs2901796  | 0.767 [0.626, 0.939] | 0.01  |

|            |                      |       |
|------------|----------------------|-------|
| rs2916148  | 0.761 [0.621, 0.931] | 0.008 |
| rs2944831  | 0.767 [0.627, 0.94]  | 0.011 |
| rs295268   | 0.764 [0.624, 0.936] | 0.009 |
| rs2978382  | 0.769 [0.628, 0.942] | 0.011 |
| rs2979139  | 0.772 [0.631, 0.945] | 0.012 |
| rs301218   | 0.767 [0.626, 0.94]  | 0.011 |
| rs308521   | 0.755 [0.618, 0.924] | 0.006 |
| rs3100052  | 0.764 [0.624, 0.936] | 0.009 |
| rs3138490  | 0.769 [0.628, 0.942] | 0.011 |
| rs34054660 | 0.772 [0.631, 0.946] | 0.012 |
| rs34329963 | 0.766 [0.626, 0.939] | 0.01  |
| rs34509802 | 0.764 [0.623, 0.936] | 0.009 |
| rs34967119 | 0.765 [0.624, 0.937] | 0.01  |
| rs35346733 | 0.768 [0.627, 0.941] | 0.011 |
| rs35524253 | 0.766 [0.625, 0.939] | 0.01  |
| rs35588117 | 0.763 [0.623, 0.934] | 0.009 |
| rs359248   | 0.754 [0.616, 0.923] | 0.006 |
| rs3743794  | 0.763 [0.623, 0.934] | 0.009 |
| rs3760381  | 0.763 [0.623, 0.934] | 0.009 |
| rs3796618  | 0.767 [0.626, 0.939] | 0.01  |
| rs3807651  | 0.767 [0.626, 0.939] | 0.01  |
| rs3808964  | 0.769 [0.628, 0.941] | 0.011 |
| rs3815983  | 0.768 [0.627, 0.941] | 0.011 |
| rs3850174  | 0.767 [0.626, 0.94]  | 0.01  |
| rs3857599  | 0.765 [0.624, 0.937] | 0.01  |
| rs3867239  | 0.772 [0.631, 0.945] | 0.012 |
| rs3923809  | 0.763 [0.623, 0.934] | 0.009 |
| rs3955311  | 0.76 [0.621, 0.93]   | 0.008 |
| rs4027217  | 0.768 [0.628, 0.941] | 0.011 |
| rs412000   | 0.765 [0.624, 0.937] | 0.01  |

|            |                      |       |
|------------|----------------------|-------|
| rs4121878  | 0.765 [0.625, 0.937] | 0.01  |
| rs42210    | 0.763 [0.623, 0.935] | 0.009 |
| rs4236237  | 0.769 [0.628, 0.942] | 0.011 |
| rs4241964  | 0.766 [0.625, 0.938] | 0.01  |
| rs4269995  | 0.776 [0.634, 0.95]  | 0.014 |
| rs4365329  | 0.767 [0.626, 0.94]  | 0.01  |
| rs4419127  | 0.766 [0.625, 0.939] | 0.01  |
| rs4535583  | 0.767 [0.626, 0.94]  | 0.01  |
| rs4550384  | 0.762 [0.622, 0.933] | 0.009 |
| rs4550782  | 0.766 [0.625, 0.938] | 0.01  |
| rs45597035 | 0.764 [0.624, 0.935] | 0.009 |
| rs465670   | 0.765 [0.624, 0.937] | 0.01  |
| rs4657983  | 0.769 [0.628, 0.942] | 0.011 |
| rs4666682  | 0.767 [0.626, 0.939] | 0.01  |
| rs4672458  | 0.767 [0.626, 0.939] | 0.01  |
| rs4690085  | 0.769 [0.629, 0.941] | 0.011 |
| rs4698678  | 0.765 [0.625, 0.938] | 0.01  |
| rs4729854  | 0.762 [0.622, 0.935] | 0.009 |
| rs4761989  | 0.766 [0.625, 0.939] | 0.01  |
| rs4775086  | 0.768 [0.627, 0.941] | 0.011 |
| rs4785296  | 0.769 [0.628, 0.942] | 0.011 |
| rs4800998  | 0.779 [0.636, 0.953] | 0.015 |
| rs4804951  | 0.768 [0.627, 0.941] | 0.011 |
| rs481214   | 0.765 [0.624, 0.937] | 0.009 |
| rs4860734  | 0.762 [0.622, 0.933] | 0.008 |
| rs487722   | 0.767 [0.627, 0.94]  | 0.011 |
| rs4878734  | 0.765 [0.625, 0.937] | 0.01  |
| rs4903203  | 0.762 [0.622, 0.934] | 0.009 |
| rs4923541  | 0.76 [0.62, 0.93]    | 0.008 |
| rs4936290  | 0.764 [0.624, 0.936] | 0.009 |

|            |                      |       |
|------------|----------------------|-------|
| rs495593   | 0.765 [0.624, 0.937] | 0.01  |
| rs497338   | 0.765 [0.625, 0.937] | 0.01  |
| rs5016898  | 0.768 [0.627, 0.941] | 0.011 |
| rs555784   | 0.766 [0.626, 0.939] | 0.01  |
| rs55846845 | 0.768 [0.627, 0.94]  | 0.011 |
| rs56113850 | 0.769 [0.627, 0.942] | 0.011 |
| rs57236847 | 0.768 [0.627, 0.941] | 0.011 |
| rs58681483 | 0.77 [0.628, 0.943]  | 0.011 |
| rs58876439 | 0.766 [0.625, 0.938] | 0.01  |
| rs59986227 | 0.762 [0.622, 0.933] | 0.008 |
| rs6007594  | 0.762 [0.622, 0.933] | 0.009 |
| rs6047481  | 0.761 [0.622, 0.931] | 0.008 |
| rs605203   | 0.772 [0.632, 0.945] | 0.012 |
| rs60616179 | 0.767 [0.626, 0.939] | 0.01  |
| rs6131805  | 0.762 [0.622, 0.934] | 0.009 |
| rs6131942  | 0.759 [0.62, 0.929]  | 0.007 |
| rs61773390 | 0.77 [0.628, 0.945]  | 0.012 |
| rs61990287 | 0.775 [0.634, 0.947] | 0.013 |
| rs62082402 | 0.766 [0.625, 0.939] | 0.01  |
| rs62124718 | 0.765 [0.624, 0.937] | 0.01  |
| rs621421   | 0.763 [0.623, 0.934] | 0.009 |
| rs62182135 | 0.769 [0.628, 0.942] | 0.011 |
| rs62465218 | 0.769 [0.628, 0.942] | 0.011 |
| rs62479736 | 0.767 [0.626, 0.94]  | 0.01  |
| rs62553781 | 0.767 [0.626, 0.939] | 0.01  |
| rs6429233  | 0.768 [0.627, 0.941] | 0.011 |
| rs6433478  | 0.765 [0.624, 0.937] | 0.01  |
| rs6440833  | 0.773 [0.632, 0.947] | 0.013 |
| rs6468316  | 0.764 [0.624, 0.935] | 0.009 |
| rs6477309  | 0.757 [0.619, 0.927] | 0.007 |

|            |                      |       |
|------------|----------------------|-------|
| rs6544906  | 0.77 [0.629, 0.943]  | 0.012 |
| rs6560218  | 0.766 [0.625, 0.938] | 0.01  |
| rs6573308  | 0.767 [0.626, 0.939] | 0.01  |
| rs662094   | 0.779 [0.637, 0.953] | 0.015 |
| rs66507804 | 0.763 [0.623, 0.934] | 0.009 |
| rs66617308 | 0.767 [0.627, 0.94]  | 0.011 |
| rs6665637  | 0.768 [0.627, 0.941] | 0.011 |
| rs6690292  | 0.766 [0.625, 0.938] | 0.01  |
| rs6718511  | 0.77 [0.629, 0.943]  | 0.012 |
| rs6727752  | 0.766 [0.626, 0.939] | 0.01  |
| rs6794796  | 0.764 [0.624, 0.936] | 0.009 |
| rs67988891 | 0.767 [0.626, 0.939] | 0.01  |
| rs6816922  | 0.758 [0.62, 0.927]  | 0.007 |
| rs6838677  | 0.766 [0.626, 0.939] | 0.01  |
| rs6846730  | 0.763 [0.623, 0.934] | 0.009 |
| rs695459   | 0.759 [0.621, 0.928] | 0.007 |
| rs6958557  | 0.763 [0.623, 0.935] | 0.009 |
| rs6961970  | 0.757 [0.619, 0.927] | 0.007 |
| rs6967481  | 0.764 [0.623, 0.936] | 0.009 |
| rs6968240  | 0.765 [0.624, 0.937] | 0.01  |
| rs6988733  | 0.768 [0.627, 0.941] | 0.011 |
| rs6993892  | 0.768 [0.627, 0.941] | 0.011 |
| rs7006885  | 0.769 [0.628, 0.943] | 0.011 |
| rs710284   | 0.765 [0.624, 0.937] | 0.01  |
| rs711098   | 0.762 [0.622, 0.934] | 0.009 |
| rs7111582  | 0.764 [0.623, 0.936] | 0.009 |
| rs7143933  | 0.765 [0.624, 0.937] | 0.01  |
| rs71523448 | 0.773 [0.631, 0.946] | 0.013 |
| rs7203707  | 0.765 [0.625, 0.937] | 0.01  |
| rs7248205  | 0.762 [0.622, 0.933] | 0.009 |

|            |                      |       |
|------------|----------------------|-------|
| rs72720396 | 0.768 [0.627, 0.941] | 0.011 |
| rs72729847 | 0.763 [0.623, 0.934] | 0.009 |
| rs72773411 | 0.763 [0.623, 0.935] | 0.009 |
| rs72790386 | 0.77 [0.629, 0.943]  | 0.011 |
| rs72796401 | 0.764 [0.624, 0.936] | 0.009 |
| rs72829706 | 0.766 [0.626, 0.939] | 0.01  |
| rs72841368 | 0.766 [0.625, 0.938] | 0.01  |
| rs72950188 | 0.766 [0.625, 0.938] | 0.01  |
| rs72966564 | 0.765 [0.625, 0.938] | 0.01  |
| rs7298532  | 0.769 [0.628, 0.942] | 0.011 |
| rs7299922  | 0.765 [0.625, 0.937] | 0.01  |
| rs73026775 | 0.764 [0.623, 0.935] | 0.009 |
| rs7304278  | 0.768 [0.627, 0.94]  | 0.011 |
| rs73050286 | 0.766 [0.626, 0.939] | 0.01  |
| rs7429614  | 0.77 [0.628, 0.943]  | 0.012 |
| rs74357745 | 0.762 [0.623, 0.933] | 0.008 |
| rs747003   | 0.767 [0.626, 0.94]  | 0.01  |
| rs75120545 | 0.763 [0.623, 0.935] | 0.009 |
| rs7602499  | 0.764 [0.624, 0.936] | 0.009 |
| rs76064513 | 0.767 [0.626, 0.94]  | 0.011 |
| rs7626335  | 0.766 [0.625, 0.938] | 0.01  |
| rs7649164  | 0.767 [0.626, 0.939] | 0.01  |
| rs76518095 | 0.764 [0.624, 0.936] | 0.009 |
| rs766406   | 0.757 [0.618, 0.926] | 0.007 |
| rs7700110  | 0.771 [0.63, 0.944]  | 0.012 |
| rs7701529  | 0.765 [0.625, 0.937] | 0.01  |
| rs7721608  | 0.765 [0.625, 0.938] | 0.01  |
| rs77960    | 0.756 [0.621, 0.919] | 0.005 |
| rs7845620  | 0.763 [0.622, 0.935] | 0.009 |
| rs7900191  | 0.766 [0.626, 0.939] | 0.01  |

|            |                      |       |
|------------|----------------------|-------|
| rs7943634  | 0.77 [0.629, 0.943]  | 0.011 |
| rs7975791  | 0.767 [0.626, 0.939] | 0.01  |
| rs80097534 | 0.764 [0.624, 0.936] | 0.009 |
| rs80271258 | 0.77 [0.628, 0.944]  | 0.012 |
| rs8044054  | 0.776 [0.634, 0.949] | 0.014 |
| rs8072058  | 0.765 [0.624, 0.937] | 0.01  |
| rs812925   | 0.763 [0.623, 0.934] | 0.009 |
| rs848552   | 0.765 [0.624, 0.937] | 0.01  |
| rs909757   | 0.764 [0.624, 0.936] | 0.009 |
| rs9347926  | 0.771 [0.63, 0.945]  | 0.012 |
| rs9348050  | 0.764 [0.624, 0.935] | 0.009 |
| rs9381812  | 0.771 [0.629, 0.946] | 0.013 |
| rs938836   | 0.765 [0.625, 0.938] | 0.01  |
| rs9394154  | 0.765 [0.624, 0.937] | 0.009 |
| rs9416744  | 0.771 [0.63, 0.945]  | 0.012 |
| rs9436119  | 0.77 [0.628, 0.944]  | 0.012 |
| rs9465253  | 0.767 [0.626, 0.939] | 0.01  |
| rs9476310  | 0.769 [0.627, 0.942] | 0.011 |
| rs9479402  | 0.768 [0.626, 0.941] | 0.011 |
| rs9496643  | 0.766 [0.625, 0.938] | 0.01  |
| rs9558942  | 0.768 [0.627, 0.941] | 0.011 |
| rs9571526  | 0.771 [0.629, 0.944] | 0.012 |
| rs9573980  | 0.76 [0.62, 0.932]   | 0.008 |
| rs9597241  | 0.772 [0.63, 0.945]  | 0.012 |
| rs9611597  | 0.761 [0.622, 0.932] | 0.008 |
| rs962961   | 0.758 [0.62, 0.927]  | 0.007 |
| rs9636202  | 0.76 [0.621, 0.929]  | 0.007 |
| rs9664044  | 0.764 [0.624, 0.936] | 0.009 |
| rs975025   | 0.764 [0.624, 0.936] | 0.009 |
| rs9817910  | 0.765 [0.625, 0.937] | 0.01  |

|           |                      |       |
|-----------|----------------------|-------|
| rs9836621 | 0.765 [0.624, 0.937] | 0.01  |
| rs9950528 | 0.772 [0.631, 0.945] | 0.012 |
| rs9956387 | 0.765 [0.625, 0.937] | 0.01  |
| rs9964420 | 0.757 [0.618, 0.928] | 0.007 |
| rs9997394 | 0.765 [0.624, 0.937] | 0.01  |
